# Supplementary material for: Human blastocysts of normal and abnormal karyotypes display distinct transcriptome profiles
Source: PubMed Central journal article supplement (PMC6175822; doi:10.1038/s41598-018-33279-0), 2018-10-08
Supplement: 41598_2018_33279_MOESM1_ESM.pdf [file 41598_2018_33279_MOESM1_ESM.pdf]

## **SUPPLEMENTARY INFORMATION**

**Human blastocysts of normal and abnormal karyotypes display distinct transcriptome profiles**

Frederick Licciardi, Tenzin Lhakang, Yael G. Kramer, Yutong Zhang, Adriana Heguy and Aristotelis Tsirigos

**Supplementary Figure 1. Sequencing and alignment statistics of RNA-seq samples. (A)** Number of uniquely aligned read pairs, **(B)** Percentage of uniquely aligned read pairs.

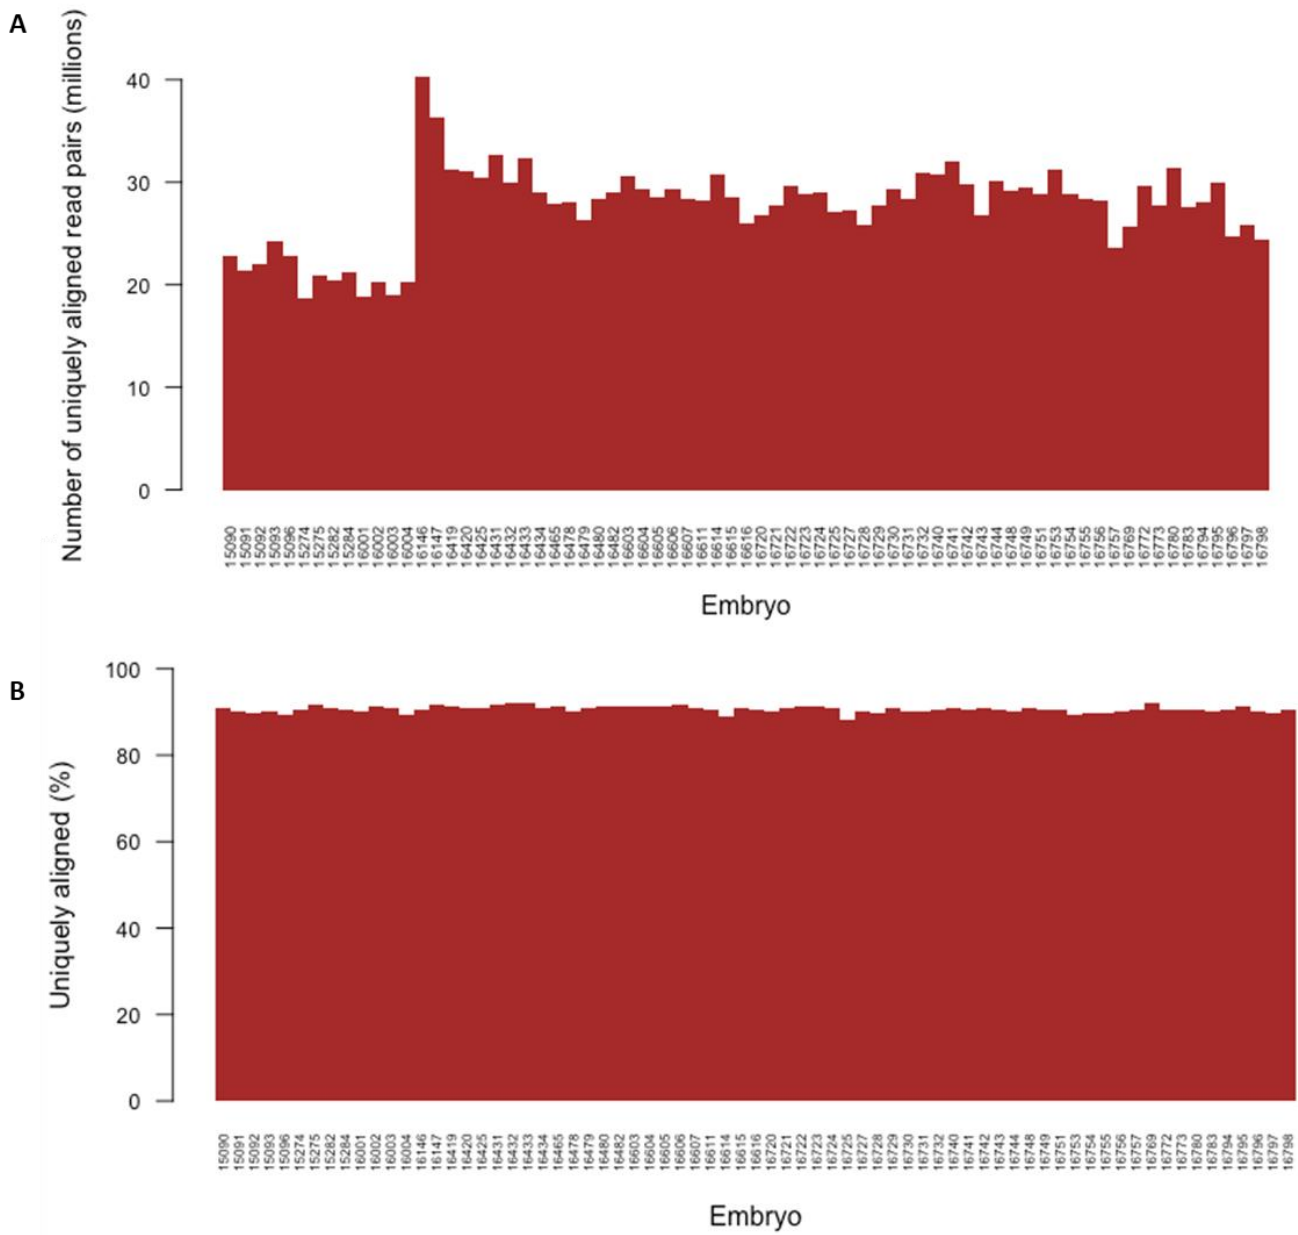

**Supplementary Figure 2. Distribution of allele frequencies of detected variants per chromosome for each embryo.**

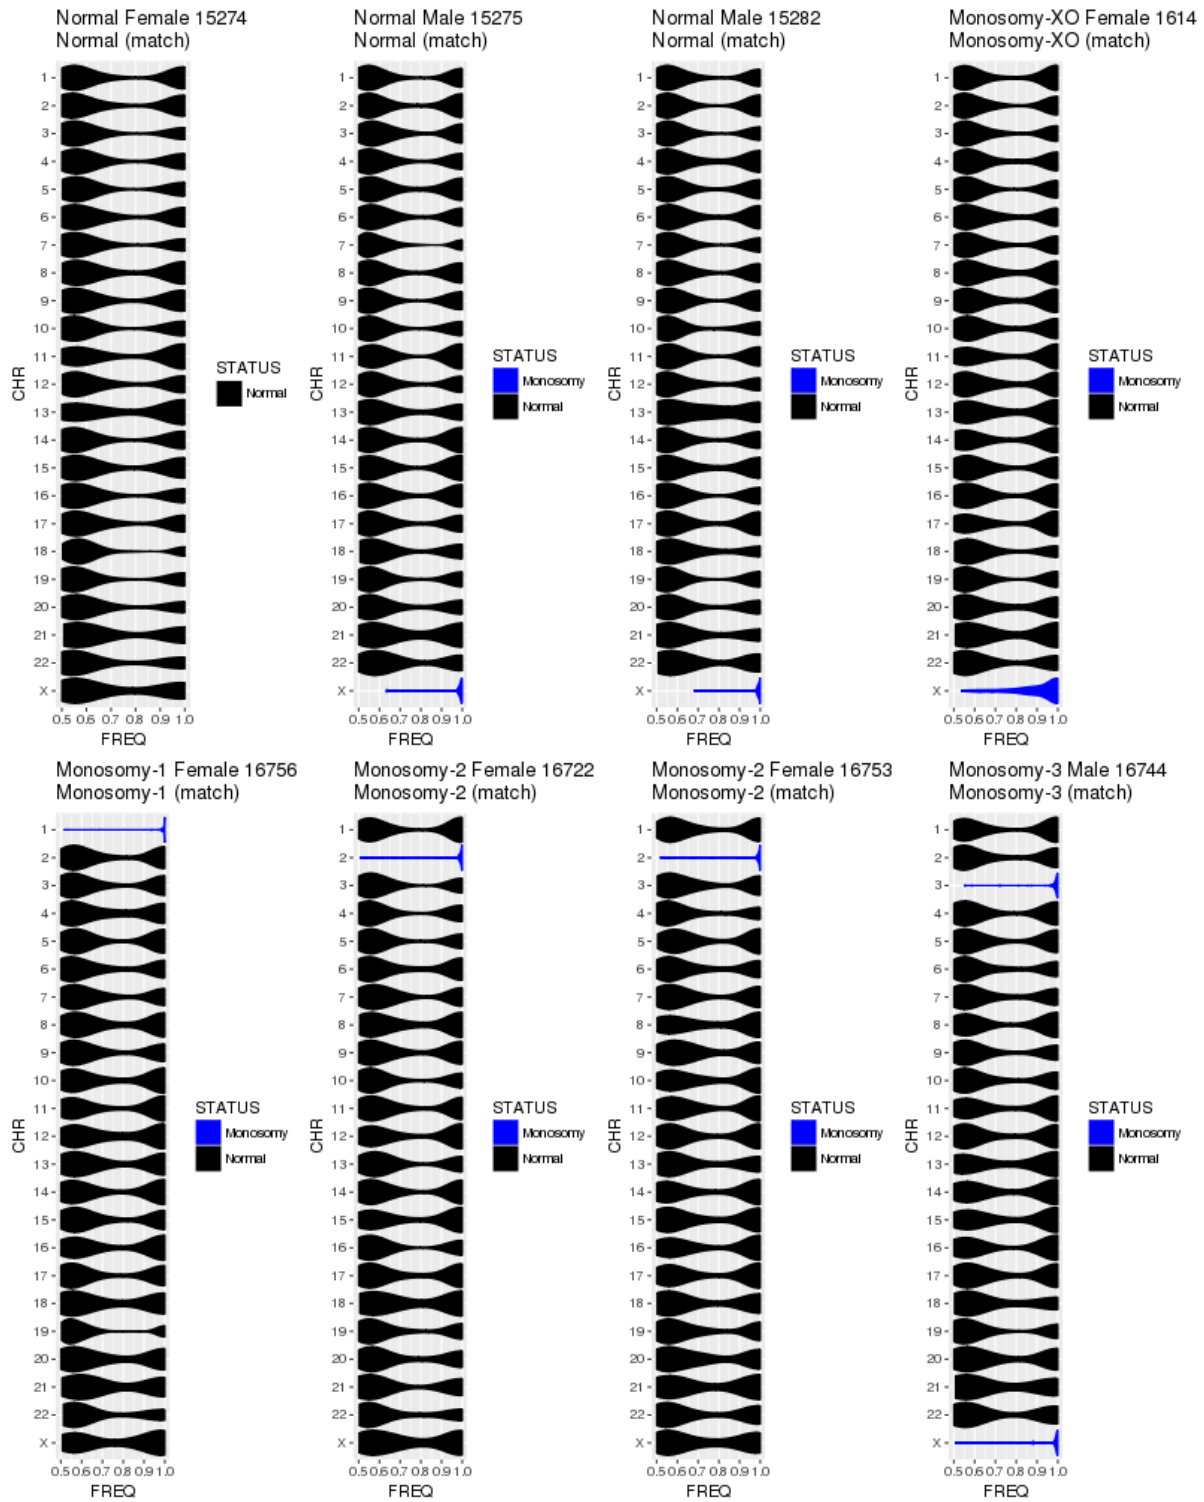

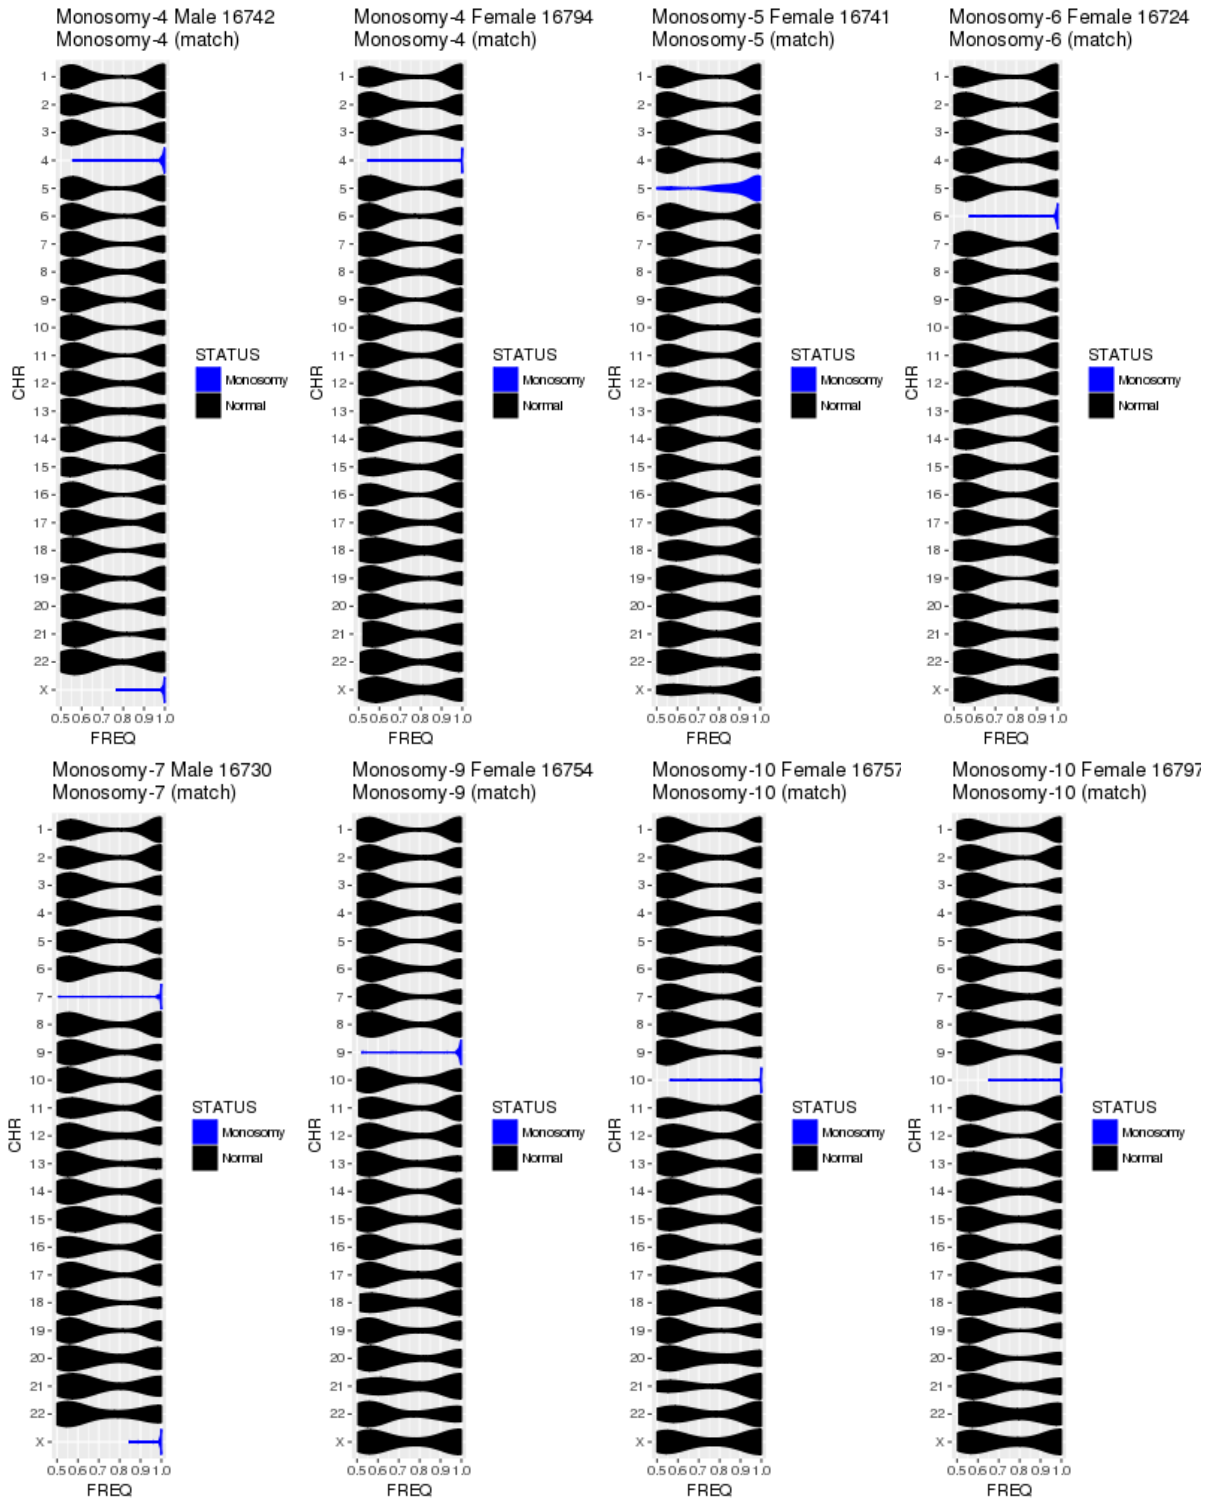

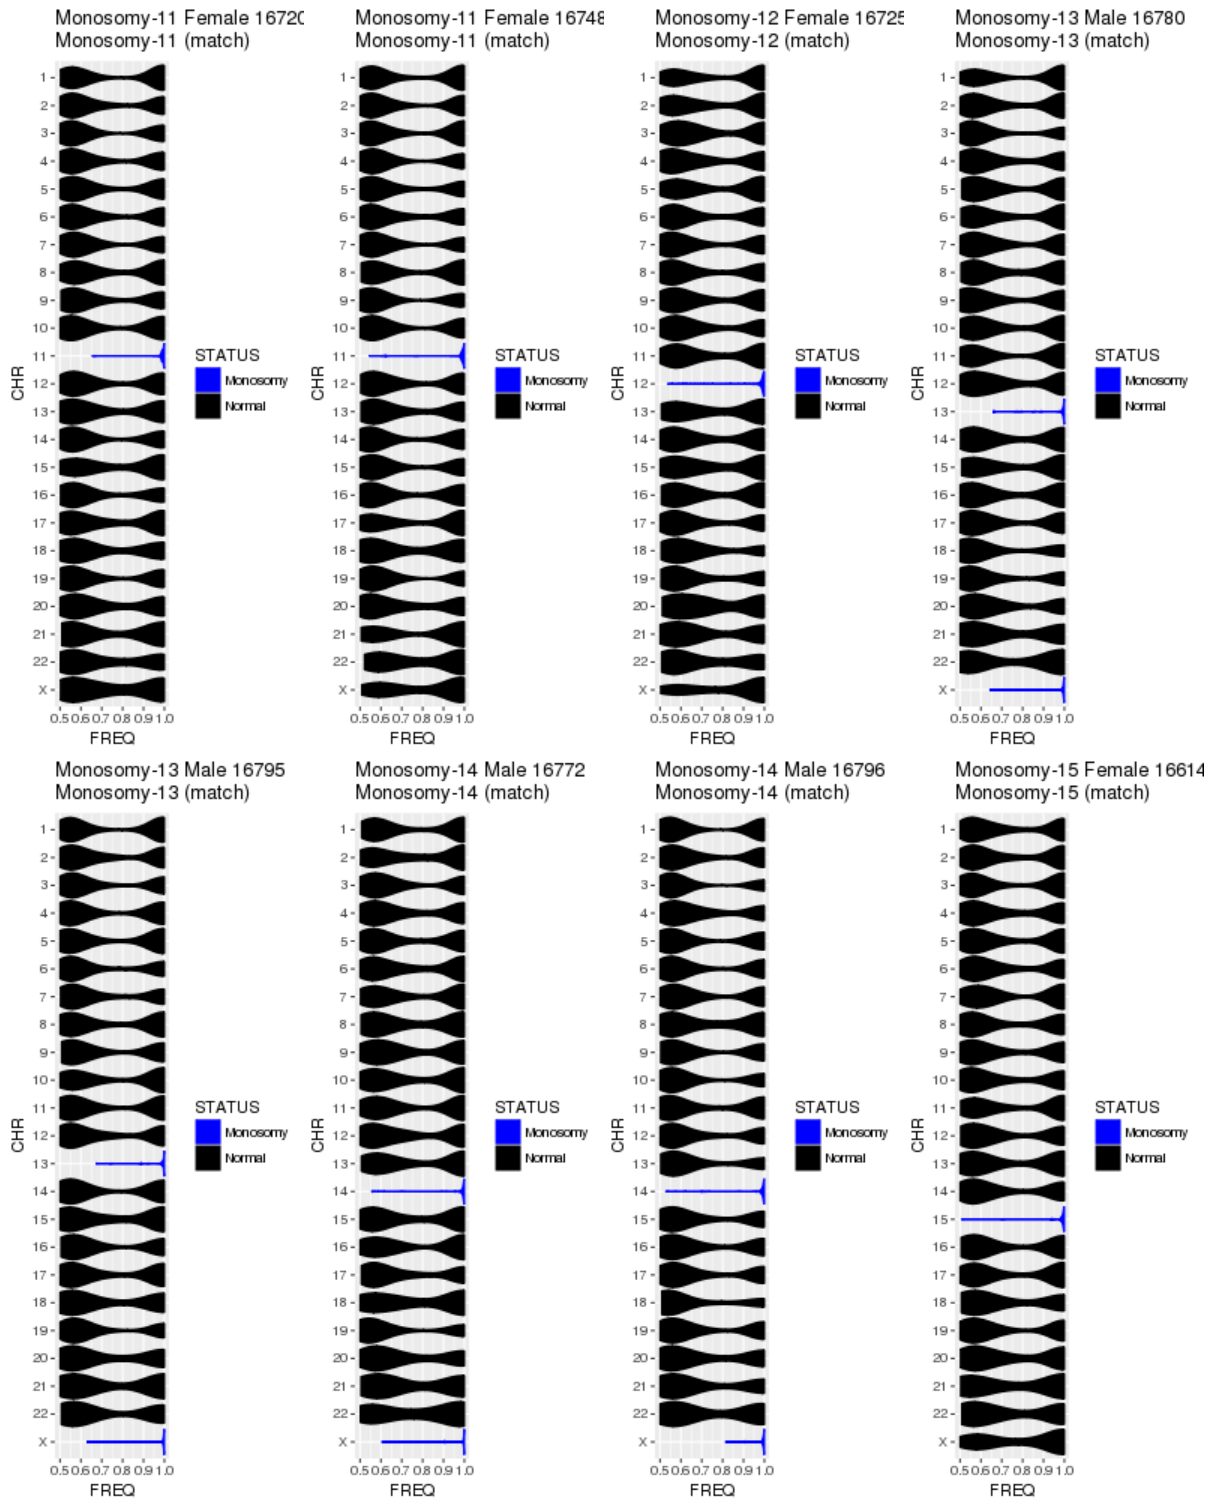

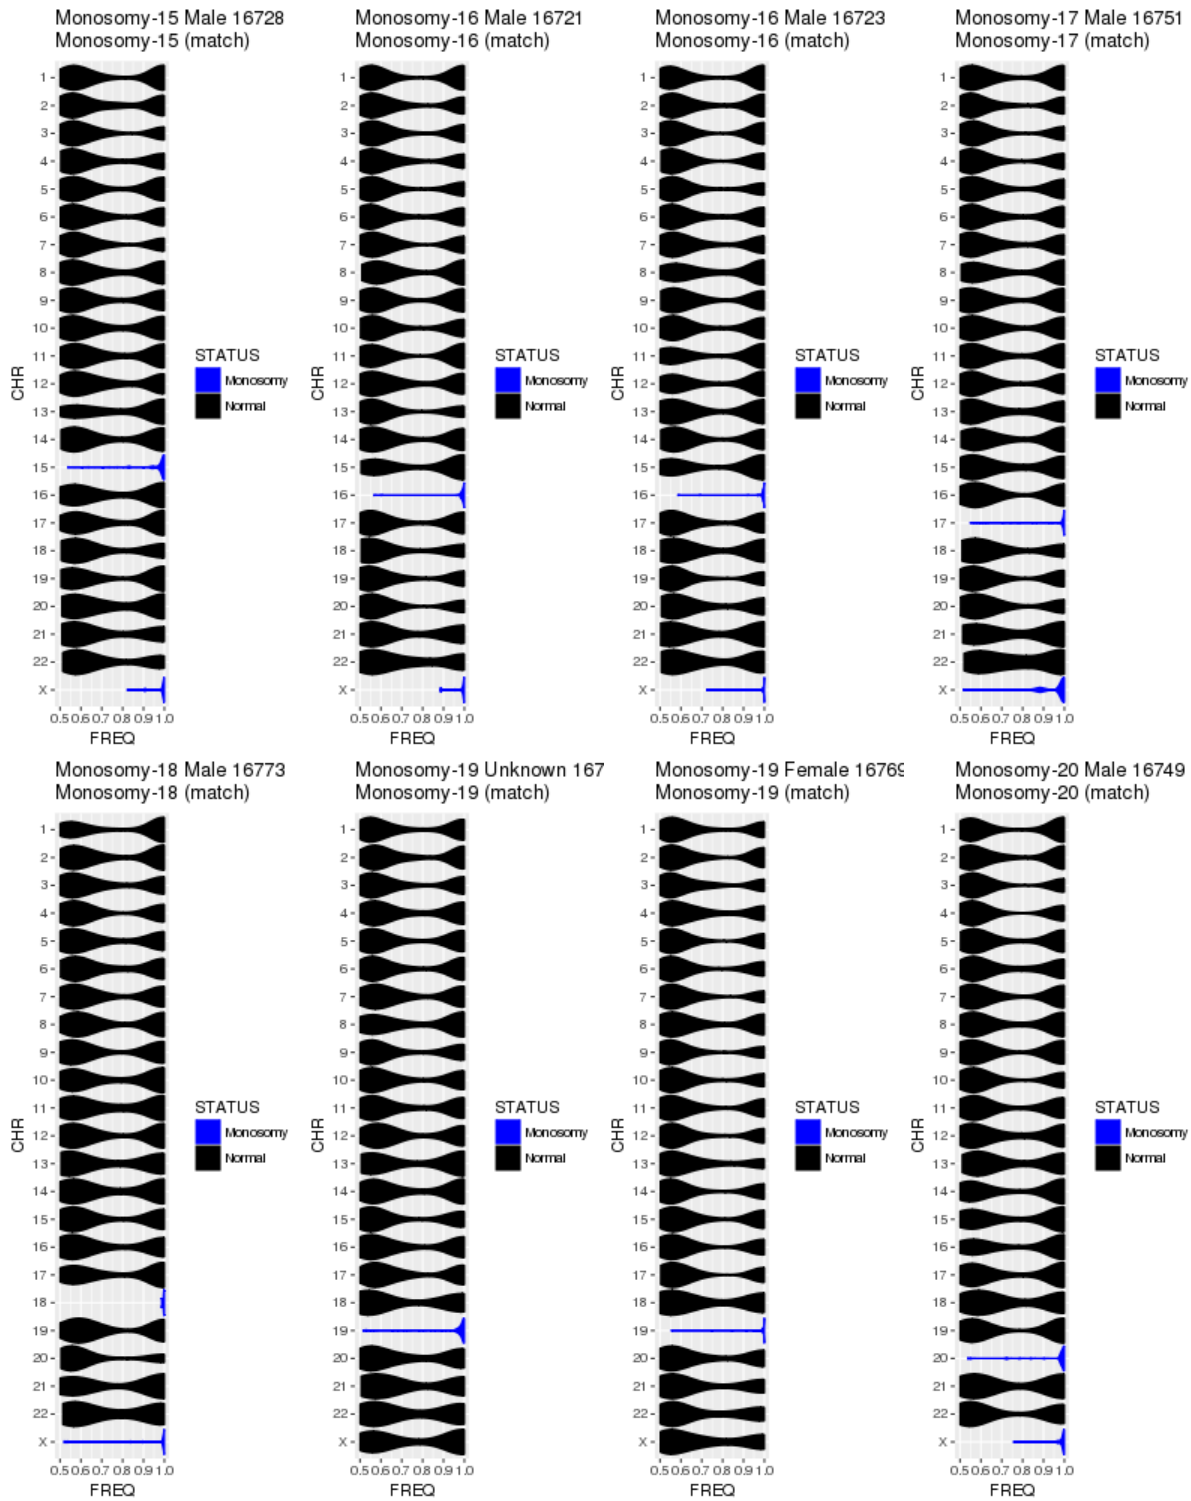

Monosomy-21 Male 16615  
Monosomy-21 (match)

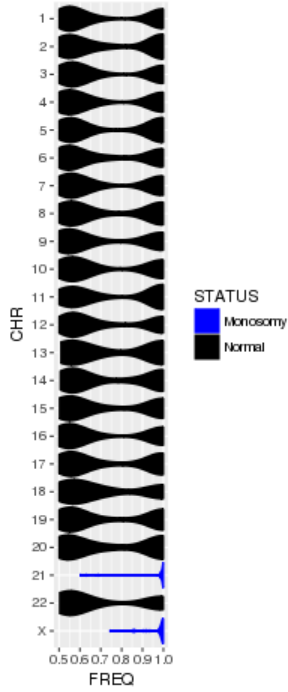

Monosomy-21 Female 16743  
Monosomy-21 (match)

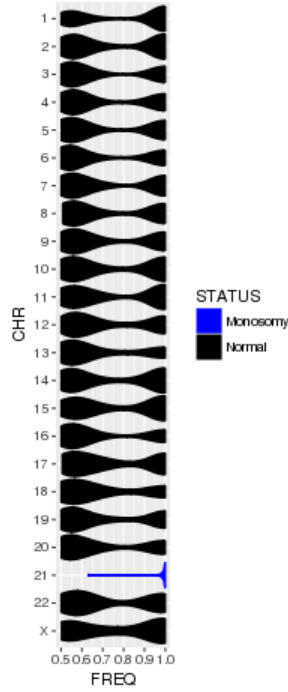

Monosomy-22 Male 16611  
Monosomy-22 (match)

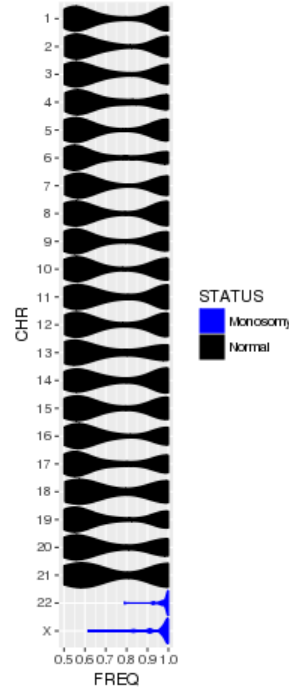

Monosomy-22 Male 16616  
Monosomy-22 (match)

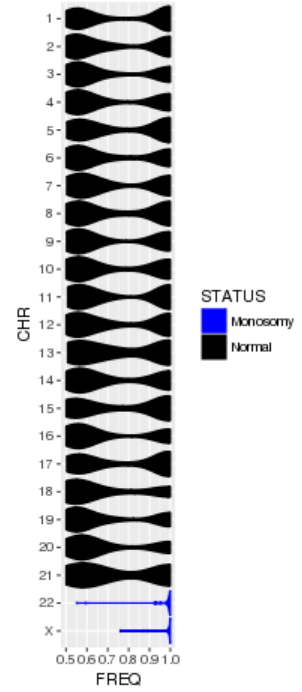

Trisomy-XXX Female 16147  
Trisomy-XXX (match)

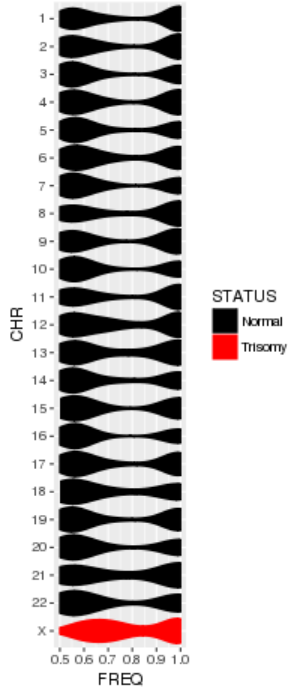

Trisomy-1 Female 16755  
Trisomy-1 (match)

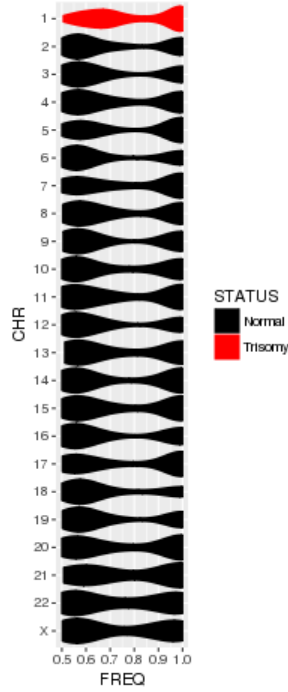

Trisomy-2 Female 16740  
Trisomy-2 (match)

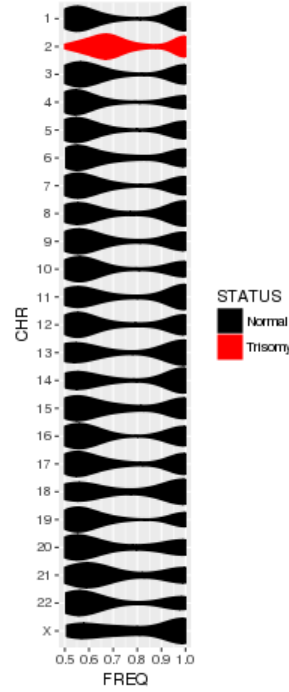

Trisomy-2 Female 16798  
Trisomy-2 (match)

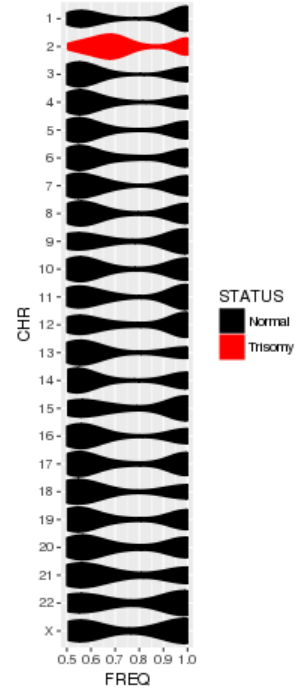

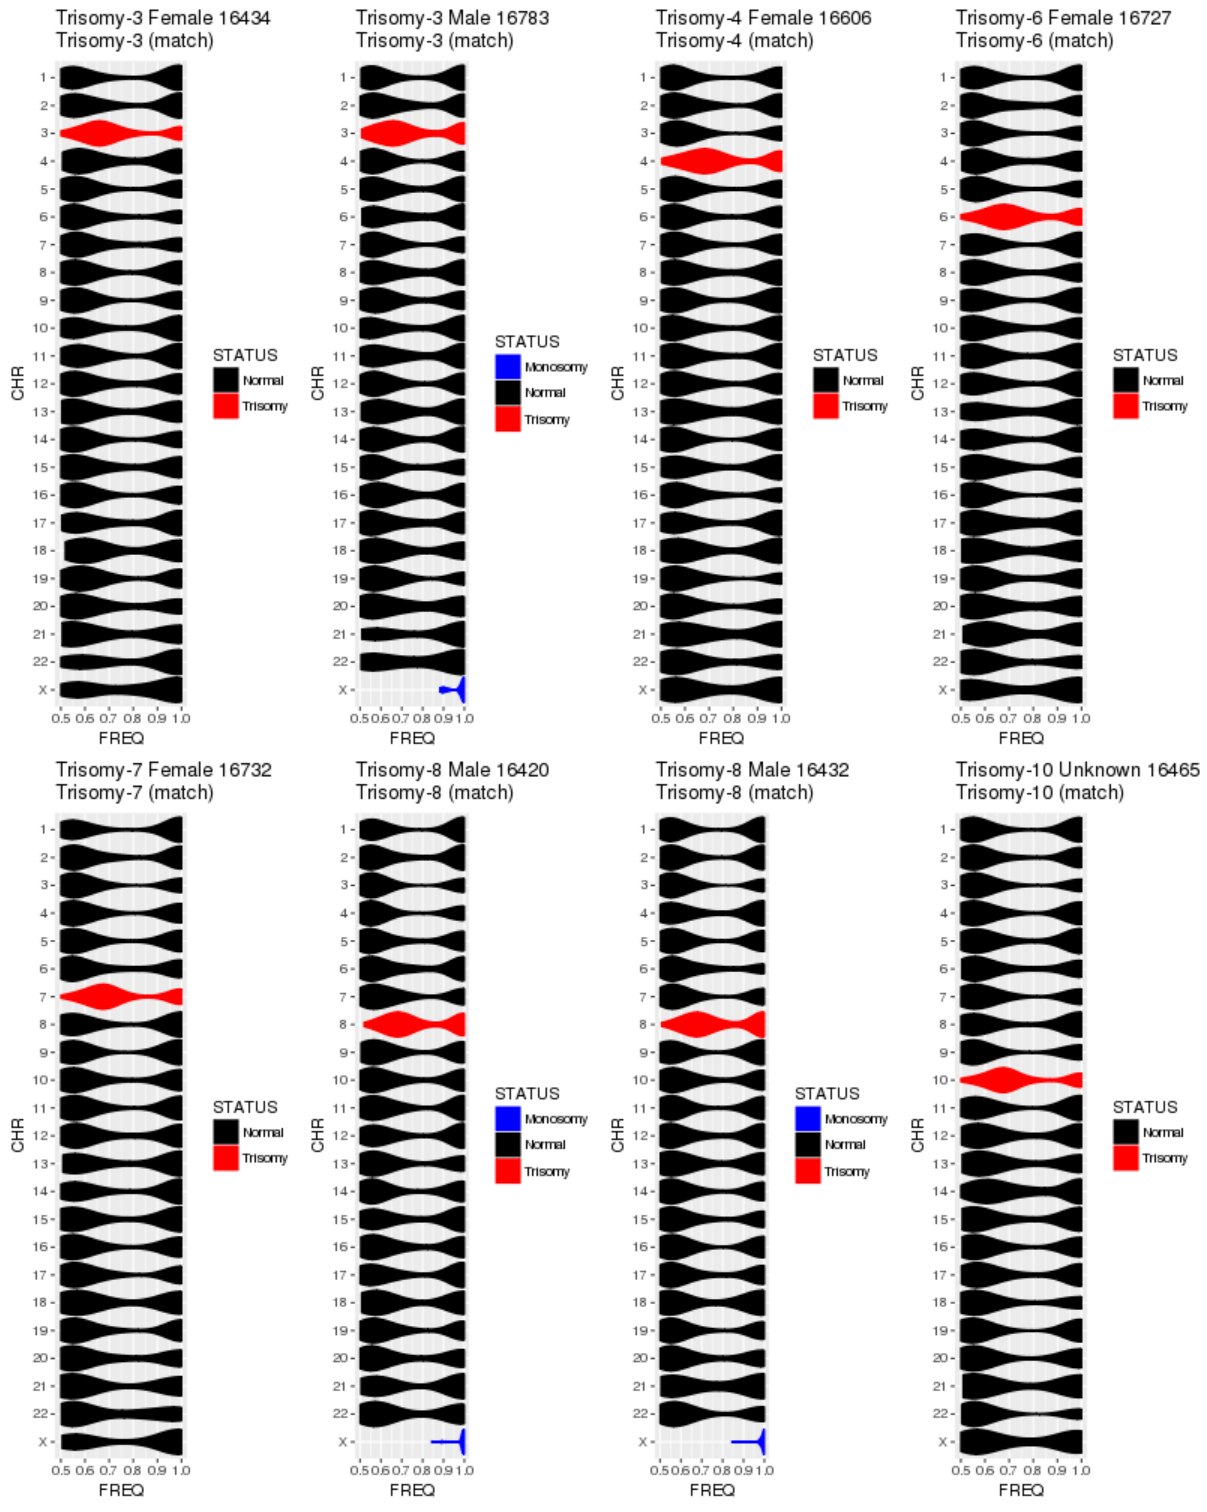



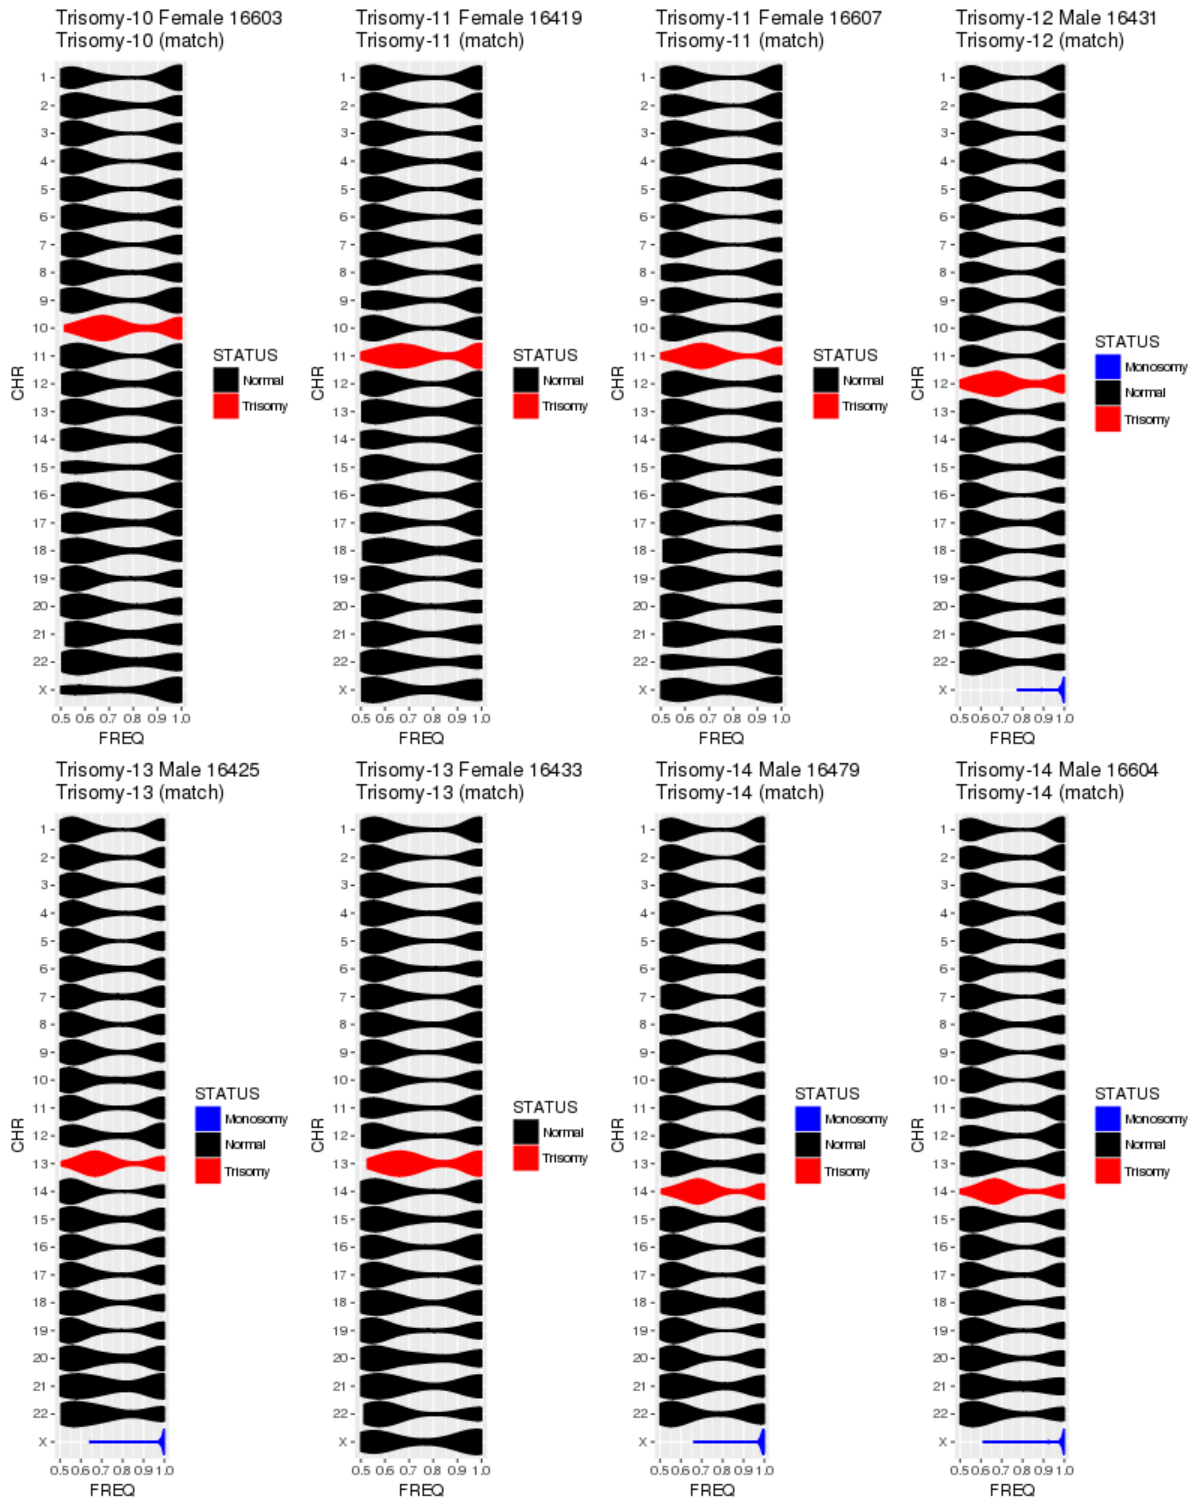

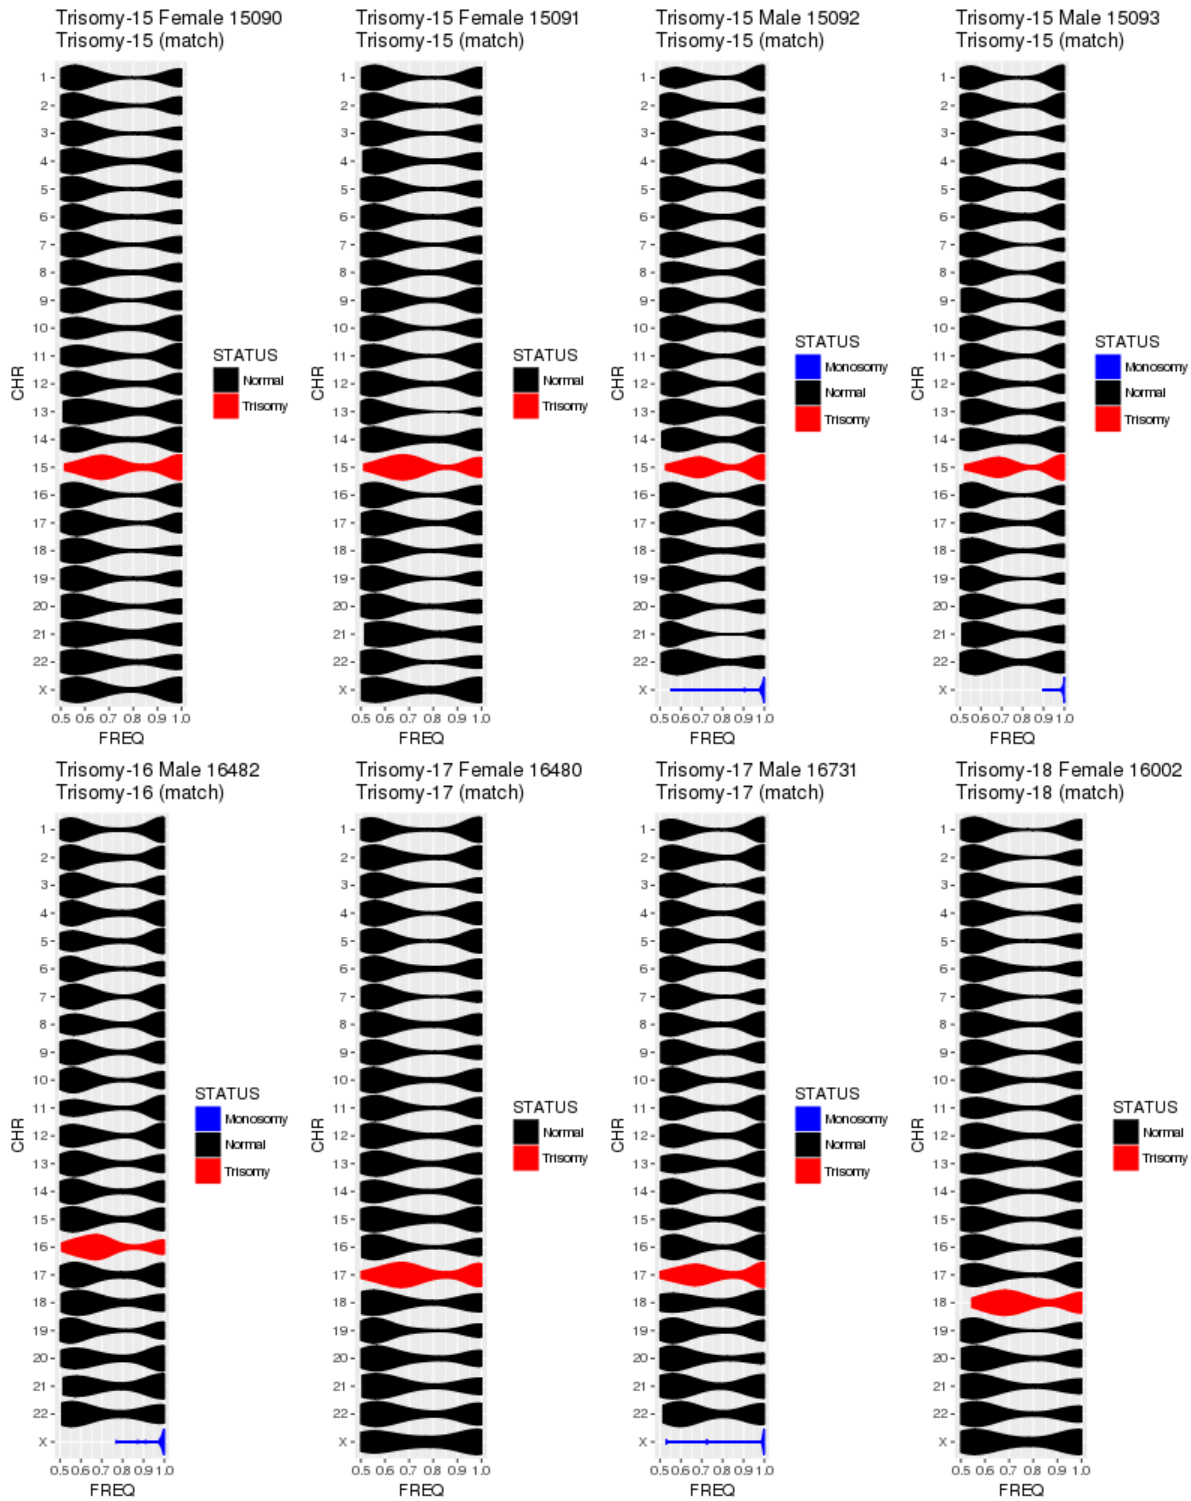

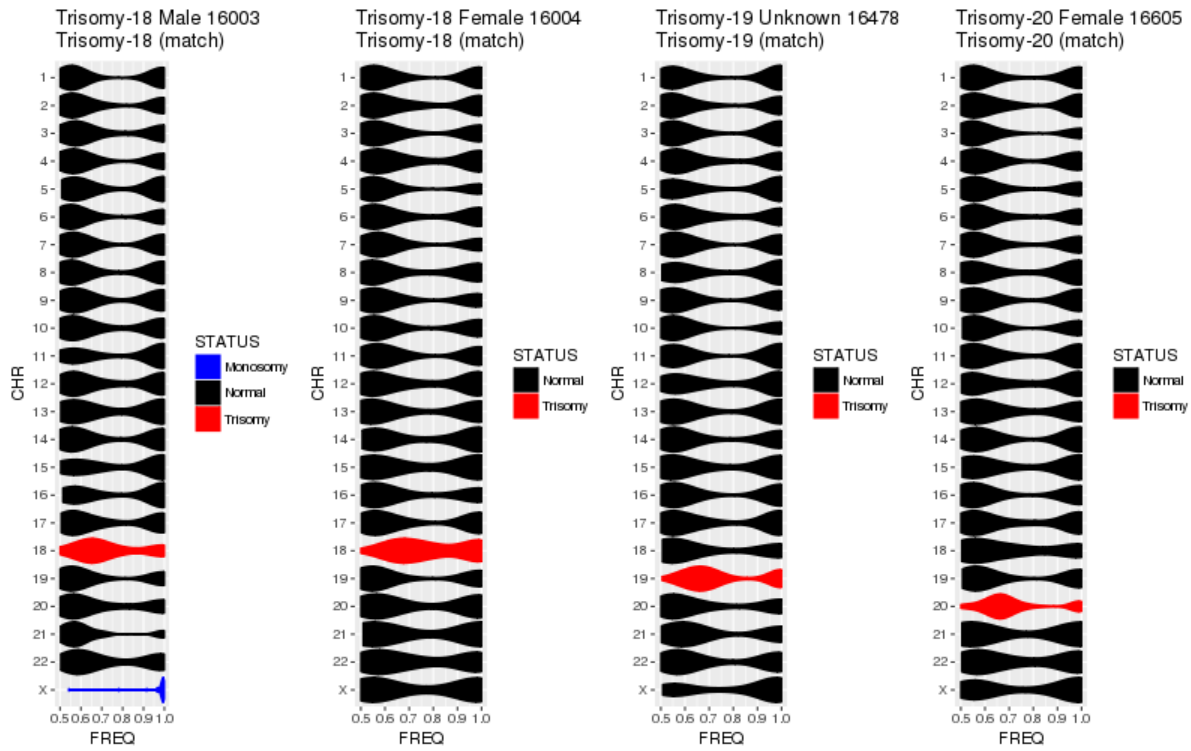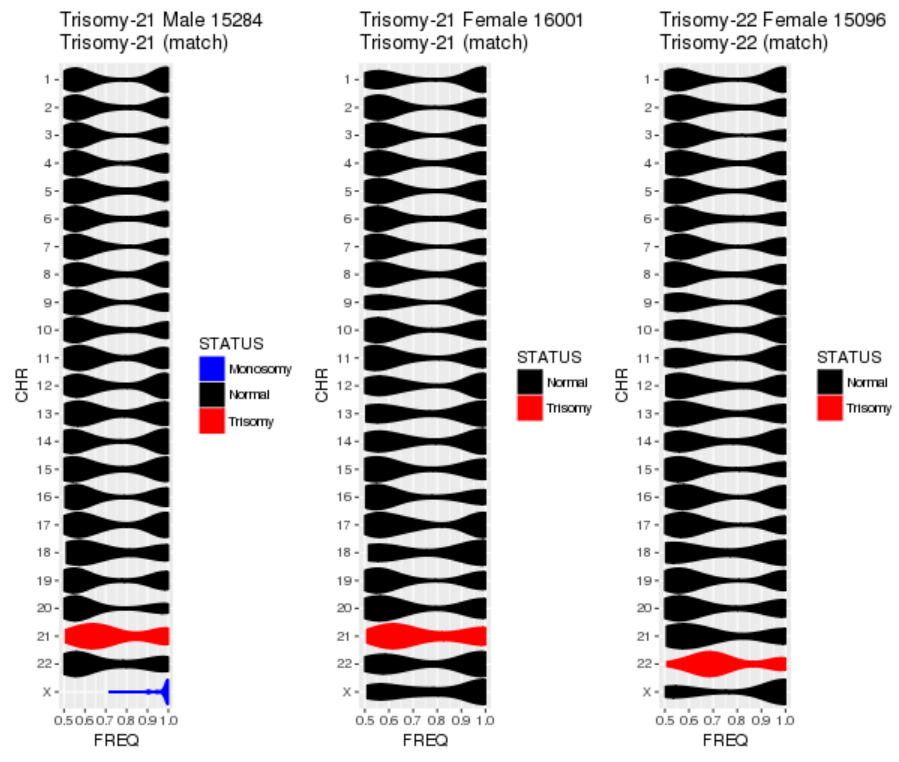

**Supplementary Table 1. Dataset description.** List of embryos used in this study with sex and karyotype information.

| <b>SAMPLE ID</b> | <b>SEX</b> | <b>STATUS</b> |
|------------------|------------|---------------|
| 15274            | Female     | Normal        |
| 15275            | Male       | Normal        |
| 15282            | Male       | Normal        |
| 16146            | Female     | Monosomy-XO   |
| 16756            | Female     | Monosomy-1    |
| 16722            | Female     | Monosomy-2    |
| 16753            | Female     | Monosomy-2    |
| 16744            | Male       | Monosomy-3    |
| 16742            | Male       | Monosomy-4    |
| 16794            | Female     | Monosomy-4    |
| 16741            | Female     | Monosomy-5    |
| 16724            | Female     | Monosomy-6    |
| 16730            | Male       | Monosomy-7    |
| 16754            | Female     | Monosomy-9    |
| 16757            | Female     | Monosomy-10   |
| 16797            | Female     | Monosomy-10   |
| 16720            | Female     | Monosomy-11   |
| 16748            | Female     | Monosomy-11   |
| 16725            | Female     | Monosomy-12   |
| 16780            | Male       | Monosomy-13   |
| 16795            | Male       | Monosomy-13   |
| 16772            | Male       | Monosomy-14   |
| 16796            | Male       | Monosomy-14   |

|       |         |             |
|-------|---------|-------------|
| 16614 | Female  | Monosomy-15 |
| 16728 | Male    | Monosomy-15 |
| 16721 | Male    | Monosomy-16 |
| 16723 | Male    | Monosomy-16 |
| 16751 | Male    | Monosomy-17 |
| 16773 | Male    | Monosomy-18 |
| 16729 | Unknown | Monosomy-19 |
| 16769 | Female  | Monosomy-19 |
| 16749 | Male    | Monosomy-20 |
| 16615 | Male    | Monosomy-21 |
| 16743 | Female  | Monosomy-21 |
| 16611 | Male    | Monosomy-22 |
| 16616 | Male    | Monosomy-22 |
| 16147 | Female  | Trisomy-XXX |
| 16755 | Female  | Trisomy-1   |
| 16740 | Female  | Trisomy-2   |
| 16798 | Female  | Trisomy-2   |
| 16434 | Female  | Trisomy-3   |
| 16783 | Male    | Trisomy-3   |
| 16606 | Female  | Trisomy-4   |
| 16727 | Female  | Trisomy-6   |
| 16732 | Female  | Trisomy-7   |
| 16420 | Male    | Trisomy-8   |
| 16432 | Male    | Trisomy-8   |
| 16465 | Unknown | Trisomy-10  |
| 16603 | Female  | Trisomy-10  |
| 16419 | Female  | Trisomy-11  |
| 16607 | Female  | Trisomy-11  |
| 16431 | Male    | Trisomy-12  |
| 16425 | Male    | Trisomy-13  |
| 16433 | Female  | Trisomy-13  |
| 16479 | Male    | Trisomy-14  |
| 16604 | Male    | Trisomy-14  |
| 15090 | Female  | Trisomy-15  |

|       |         |            |
|-------|---------|------------|
| 15091 | Female  | Trisomy-15 |
| 15092 | Male    | Trisomy-15 |
| 15093 | Male    | Trisomy-15 |
| 16482 | Male    | Trisomy-16 |
| 16480 | Female  | Trisomy-17 |
| 16731 | Male    | Trisomy-17 |
| 16002 | Female  | Trisomy-18 |
| 16003 | Male    | Trisomy-18 |
| 16004 | Female  | Trisomy-18 |
| 16478 | Unknown | Trisomy-19 |
| 16605 | Female  | Trisomy-20 |
| 15284 | Male    | Trisomy-21 |
| 16001 | Female  | Trisomy-21 |
| 15096 | Female  | Trisomy-22 |

**Supplementary Table 2. List of enriched KEGG pathways.** P-values, adjusted P-values and enrichment scores of significantly enriched KEGG pathways in the list of commonly expressed genes across five normal embryos.

| <b>Term</b>                                                                      | <b>P-value</b> | <b>Adjusted P-value</b> |
|----------------------------------------------------------------------------------|----------------|-------------------------|
| Oxidative phosphorylation_Homo sapiens_hsa00190                                  | 3.0681E-43     | 4.2953E-41              |
| Spliceosome_Homo sapiens_hsa03040                                                | 7.6073E-32     | 7.1002E-30              |
| Huntington's disease_Homo sapiens_hsa05016                                       | 3.1625E-31     | 2.2137E-29              |
| RNA transport_Homo sapiens_hsa03013                                              | 1.9605E-29     | 1.0979E-27              |
| Parkinson's disease_Homo sapiens_hsa05012                                        | 1.6323E-28     | 7.6173E-27              |
| Metabolic pathways_Homo sapiens_hsa01100                                         | 1.9051E-25     | 7.6205E-24              |
| Alzheimer's disease_Homo sapiens_hsa05010                                        | 6.8313E-23     | 2.391E-21               |
| Cell cycle_Homo sapiens_hsa04110                                                 | 3.9329E-18     | 1.2236E-16              |
| Protein processing in endoplasmic reticulum_Homo sapiens_hsa04141                | 2.1001E-17     | 5.8803E-16              |
| Non-alcoholic fatty liver disease (NAFLD)_Homo sapiens_hsa04932                  | 8.1098E-17     | 2.0643E-15              |
| Ribosome biogenesis in eukaryotes_Homo sapiens_hsa03008                          | 1.2539E-16     | 2.9257E-15              |
| Proteasome_Homo sapiens_hsa03050                                                 | 1.0021E-14     | 2.1584E-13              |
| Protein export_Homo sapiens_hsa03060                                             | 2.7618E-12     | 5.5236E-11              |
| Carbon metabolism_Homo sapiens_hsa01200                                          | 1.2837E-11     | 2.3962E-10              |
| Pyrimidine metabolism_Homo sapiens_hsa00240                                      | 5.9815E-10     | 1.0468E-08              |
| mRNA surveillance pathway_Homo sapiens_hsa03015                                  | 7.6247E-10     | 1.2558E-08              |
| RNA degradation_Homo sapiens_hsa03018                                            | 8.1357E-10     | 1.2656E-08              |
| DNA replication_Homo sapiens_hsa03030                                            | 9.053E-10      | 1.3341E-08              |
| Vibrio cholerae infection_Homo sapiens_hsa05110                                  | 5.9175E-09     | 8.2845E-08              |
| Epstein-Barr virus infection_Homo sapiens_hsa05169                               | 1.3952E-08     | 1.8602E-07              |
| Citrate cycle (TCA cycle)_Homo sapiens_hsa00020                                  | 3.5576E-07     | 4.5278E-06              |
| Oocyte meiosis_Homo sapiens_hsa04114                                             | 4.3829E-07     | 5.3357E-06              |
| Ubiquitin mediated proteolysis_Homo sapiens_hsa04120                             | 6.0624E-07     | 6.7899E-06              |
| Nucleotide excision repair_Homo sapiens_hsa03420                                 | 5.9454E-07     | 6.7899E-06              |
| Pathogenic Escherichia coli infection_Homo sapiens_hsa05130                      | 9.1786E-07     | 9.8846E-06              |
| Purine metabolism_Homo sapiens_hsa00230                                          | 1.3861E-06     | 1.4374E-05              |
| RNA polymerase_Homo sapiens_hsa03020                                             | 7.0806E-06     | 7.0806E-05              |
| Collecting duct acid secretion_Homo sapiens_hsa04966                             | 1.5608E-05     | 0.0001507               |
| Lysosome_Homo sapiens_hsa04142                                                   | 2.165E-05      | 0.00019635              |
| Epithelial cell signaling in Helicobacter pylori infection_Homo sapiens_hsa05120 | 2.1739E-05     | 0.00019635              |
| Terpenoid backbone biosynthesis_Homo sapiens_hsa00900                            | 3.3066E-05     | 0.00028933              |
| Biosynthesis of amino acids_Homo sapiens_hsa01230                                | 3.7492E-05     | 0.00031811              |
| Synaptic vesicle cycle_Homo sapiens_hsa04721                                     | 5.2068E-05     | 0.0004288               |
| Mismatch repair_Homo sapiens_hsa03430                                            | 5.917E-05      | 0.00047336              |
| Basal transcription factors_Homo sapiens_hsa03022                                | 8.5013E-05     | 0.00064334              |
| Cysteine and methionine metabolism_Homo sapiens_hsa00270                         | 8.5013E-05     | 0.00064334              |
| Shigellosis_Homo sapiens_hsa05131                                                | 9.1172E-05     | 0.00067179              |
| Cardiac muscle contraction_Homo sapiens_hsa04260                                 | 0.00010347     | 0.00074283              |
| Aminoacyl-tRNA biosynthesis_Homo sapiens_hsa00970                                | 0.00011915     | 0.00083408              |

|                                                                  |            |            |
|------------------------------------------------------------------|------------|------------|
| Phagosome_Homo sapiens_hsa04145                                  | 0.00041242 | 0.00281653 |
| Endocytosis_Homo sapiens_hsa04144                                | 0.00043036 | 0.00283498 |
| Glycolysis / Gluconeogenesis_Homo sapiens_hsa00010               | 0.00043537 | 0.00283498 |
| Propanoate metabolism_Homo sapiens_hsa00640                      | 0.00068037 | 0.00432965 |
| Valine, leucine and isoleucine degradation_Homo sapiens_hsa00280 | 0.00072113 | 0.004487   |
| Pentose phosphate pathway_Homo sapiens_hsa00030                  | 0.00089629 | 0.00545568 |
| Base excision repair_Homo sapiens_hsa03410                       | 0.00096124 | 0.00572655 |
| Glutathione metabolism_Homo sapiens_hsa00480                     | 0.00198635 | 0.01158703 |
| Fatty acid metabolism_Homo sapiens_hsa01212                      | 0.00212657 | 0.01215184 |
| Pyruvate metabolism_Homo sapiens_hsa00620                        | 0.00236281 | 0.01323173 |
| 2-Oxocarboxylic acid metabolism_Homo sapiens_hsa01210            | 0.00247875 | 0.0136088  |
| Fatty acid elongation_Homo sapiens_hsa00062                      | 0.00322284 | 0.01735378 |
| Bacterial invasion of epithelial cells_Homo sapiens_hsa05100     | 0.00394277 | 0.02082971 |
| Viral carcinogenesis_Homo sapiens_hsa05203                       | 0.00485955 | 0.02519765 |
| N-Glycan biosynthesis_Homo sapiens_hsa00510                      | 0.0071061  | 0.03617649 |
| Glyoxylate and dicarboxylate metabolism_Homo sapiens_hsa00630    | 0.00823326 | 0.04050666 |
| Steroid biosynthesis_Homo sapiens_hsa00100                       | 0.008246   | 0.04050666 |
| p53 signaling pathway_Homo sapiens_hsa04115                      | 0.00930613 | 0.04492613 |



**Supplementary Table 3. List of expressed chromosome Y genes.** Gene symbols, gene descriptions and average FPKM values of chromosome Y genes (cutoff FPKM = 1).

| <b>Gene Symbol</b> | <b>Mean</b> | <b>Gene Biotype</b>  | <b>Description</b>                                                                                      |
|--------------------|-------------|----------------------|---------------------------------------------------------------------------------------------------------|
| RPS4Y1             | 92.00       | protein_coding       | ribosomal protein S4, Y-linked 1 [Source:HGNC Symbol;Acc:HGNC:10425]                                    |
| CD24P4             | 41.92       | processed_pseudogene | CD24 molecule pseudogene 4 [Source:HGNC Symbol;Acc:HGNC:1649]                                           |
| EIF1AY             | 18.78       | protein_coding       | eukaryotic translation initiation factor 1A, Y-linked [Source:HGNC Symbol;Acc:HGNC:3252]                |
| DDX3Y              | 8.55        | protein_coding       | DEAD (Asp-Glu-Ala-Asp) box helicase 3, Y-linked [Source:HGNC Symbol;Acc:HGNC:2699]                      |
| PSMA6P1            | 2.64        | processed_pseudogene | proteasome (prosome, macropain) subunit, alpha type, 6 pseudogene 1 [Source:HGNC Symbol;Acc:HGNC:17460] |
| ZFY                | 2.13        | protein_coding       | zinc finger protein, Y-linked [Source:HGNC Symbol;Acc:HGNC:12870]                                       |
| RNA5-8SP6          | 1.78        | rRNA                 | RNA, 5.8S ribosomal pseudogene 6 [Source:HGNC Symbol;Acc:HGNC:41960]                                    |
| AC010970.2         | 1.03        | processed_pseudogene | N/A                                                                                                     |
| TTY15              | 1.02        | lincRNA              | testis-specific transcript, Y-linked 15 (non-protein coding) [Source:HGNC Symbol;Acc:HGNC:18567]        |

**Supplementary Table 4. List of enriched pathways (trisomies).** P-values, adjusted P-values and enrichment scores of significantly enriched pathways in the list of genes that are frequently deregulated in trisomies.

| <b>Term</b>                                                                                                                                   | <b>P-value</b> | <b>Adjusted P-value</b> |
|-----------------------------------------------------------------------------------------------------------------------------------------------|----------------|-------------------------|
| Cell Cycle, Mitotic_Homo sapiens_R-HSA-69278                                                                                                  | 2.6512E-08     | 2.3251E-05              |
| HIV Infection_Homo sapiens_R-HSA-162906                                                                                                       | 1.9092E-07     | 8.1589E-05              |
| Cell Cycle_Homo sapiens_R-HSA-1640170                                                                                                         | 2.9542E-07     | 8.1589E-05              |
| Gene Expression_Homo sapiens_R-HSA-74160                                                                                                      | 3.7213E-07     | 8.1589E-05              |
| HIV Life Cycle_Homo sapiens_R-HSA-162587                                                                                                      | 8.0225E-07     | 0.00014071              |
| Mitotic G1-G1/S phases_Homo sapiens_R-HSA-453279                                                                                              | 2.7651E-06     | 0.00040417              |
| Late Phase of HIV Life Cycle_Homo sapiens_R-HSA-162599                                                                                        | 7.2631E-06     | 0.00090997              |
| G1/S Transition_Homo sapiens_R-HSA-69206                                                                                                      | 9.4001E-06     | 0.00103048              |
| Metabolism of proteins_Homo sapiens_R-HSA-392499                                                                                              | 1.3816E-05     | 0.00134631              |
| Processing of Capped Intron-Containing Pre-mRNA_Homo sapiens_R-HSA-72203                                                                      | 3.7575E-05     | 0.00329537              |
| tRNA processing in the nucleus_Homo sapiens_R-HSA-6784531                                                                                     | 4.1958E-05     | 0.00334517              |
| M Phase_Homo sapiens_R-HSA-68886                                                                                                              | 4.5837E-05     | 0.00334995              |
| Infectious disease_Homo sapiens_R-HSA-5663205                                                                                                 | 5.2829E-05     | 0.00356394              |
| Synthesis of DNA_Homo sapiens_R-HSA-69239                                                                                                     | 7.2343E-05     | 0.00453177              |
| Autodegradation of Cdh1 by Cdh1:APC/C_Homo sapiens_R-HSA-174084                                                                               | 7.7746E-05     | 0.00454557              |
| Separation of Sister Chromatids_Homo sapiens_R-HSA-2467813                                                                                    | 8.8529E-05     | 0.00485248              |
| DNA Replication Pre-Initiation_Homo sapiens_R-HSA-69002                                                                                       | 0.00010165     | 0.0049526               |
| M/G1 Transition_Homo sapiens_R-HSA-68874                                                                                                      | 0.00010165     | 0.0049526               |
| APC/C:Cdc20 mediated degradation of Securin_Homo sapiens_R-HSA-174154                                                                         | 0.00012201     | 0.00526204              |
| S Phase_Homo sapiens_R-HSA-69242                                                                                                              | 0.000126       | 0.00526204              |
| tRNA processing_Homo sapiens_R-HSA-72306                                                                                                      | 0.00012024     | 0.00526204              |
| DNA Replication_Homo sapiens_R-HSA-69306                                                                                                      | 0.00014123     | 0.00538508              |
| Assembly of the pre-replicative complex_Homo sapiens_R-HSA-68867                                                                              | 0.00013584     | 0.00538508              |
| Mitotic Anaphase_Homo sapiens_R-HSA-68882                                                                                                     | 0.00017148     | 0.00560296              |
| Mitotic Metaphase and Anaphase_Homo sapiens_R-HSA-2555396                                                                                     | 0.00018157     | 0.00560296              |
| Host Interactions of HIV factors_Homo sapiens_R-HSA-162909                                                                                    | 0.00017911     | 0.00560296              |
| Orc1 removal from chromatin_Homo sapiens_R-HSA-68949                                                                                          | 0.00018527     | 0.00560296              |
| Switching of origins to a post-replicative state_Homo sapiens_R-HSA-69052                                                                     | 0.00018527     | 0.00560296              |
| Respiratory electron transport_Homo sapiens_R-HSA-611105                                                                                      | 0.00017578     | 0.00560296              |
| APC/C:Cdh1 mediated degradation of Cdc20 and other APC/C:Cdh1 targeted proteins in late mitosis/early G1_Homo sapiens_R-HSA-174178            | 0.00020471     | 0.00561041              |
| Cdc20:Phospho-APC/C mediated degradation of Cyclin A_Homo sapiens_R-HSA-174184                                                                | 0.00020471     | 0.00561041              |
| Respiratory electron transport, ATP synthesis by chemiosmotic coupling, and heat production by uncoupling proteins._Homo sapiens_R-HSA-163200 | 0.00019256     | 0.00561041              |
| Removal of licensing factors from origins_Homo sapiens_R-HSA-69300                                                                            | 0.00022579     | 0.00582414              |
| APC:Cdc20 mediated degradation of cell cycle proteins prior to satisfaction of the cell cycle checkpoint_Homo sapiens_R-HSA-179419            | 0.00022579     | 0.00582414              |
| mRNA Splicing - Major Pathway_Homo sapiens_R-HSA-72163                                                                                        | 0.0002501      | 0.00626674              |

|                                                                                                                                                       |            |            |
|-------------------------------------------------------------------------------------------------------------------------------------------------------|------------|------------|
| APC/C:Cdc20 mediated degradation of mitotic proteins_Homo sapiens_R-HSA-176409                                                                        | 0.0002733  | 0.00665794 |
| Disease_Homo sapiens_R-HSA-1643685                                                                                                                    | 0.00029218 | 0.00674504 |
| Regulation of DNA replication_Homo sapiens_R-HSA-69304                                                                                                | 0.00029995 | 0.00674504 |
| Activation of APC/C and APC/C:Cdc20 mediated degradation of mitotic proteins_Homo sapiens_R-HSA-176814                                                | 0.00029995 | 0.00674504 |
| Viral Messenger RNA Synthesis_Homo sapiens_R-HSA-168325                                                                                               | 0.00035142 | 0.00770495 |
| Transcriptional Regulation by TP53_Homo sapiens_R-HSA-3700989                                                                                         | 0.0004222  | 0.00894991 |
| Regulation of APC/C activators between G1/S and early anaphase_Homo sapiens_R-HSA-176408                                                              | 0.00042862 | 0.00894991 |
| mRNA Splicing_Homo sapiens_R-HSA-72172                                                                                                                | 0.00046467 | 0.00947717 |
| Activation of the pre-replicative complex_Homo sapiens_R-HSA-68962                                                                                    | 0.00053103 | 0.01058434 |
| Antigen processing-Cross presentation_Homo sapiens_R-HSA-1236975                                                                                      | 0.00055192 | 0.01075632 |
| Hedgehog ligand biogenesis_Homo sapiens_R-HSA-5358346                                                                                                 | 0.00061142 | 0.01165681 |
| Class I MHC mediated antigen processing & presentation_Homo sapiens_R-HSA-983169                                                                      | 0.00066372 | 0.01227819 |
| ER-Phagosome pathway_Homo sapiens_R-HSA-1236974                                                                                                       | 0.00067201 | 0.01227819 |
| APC/C-mediated degradation of cell cycle proteins_Homo sapiens_R-HSA-174143                                                                           | 0.00070245 | 0.01232098 |
| Regulation of mitotic cell cycle_Homo sapiens_R-HSA-453276                                                                                            | 0.00070245 | 0.01232098 |
| Vpr-mediated nuclear import of PICs_Homo sapiens_R-HSA-180910                                                                                         | 0.00072289 | 0.01243085 |
| The citric acid (TCA) cycle and respiratory electron transport_Homo sapiens_R-HSA-1428517                                                             | 0.00077284 | 0.01268543 |
| Conversion from APC/C:Cdc20 to APC/C:Cdh1 in late anaphase_Homo sapiens_R-HSA-176407                                                                  | 0.00078109 | 0.01268543 |
| Phosphorylation of the APC/C_Homo sapiens_R-HSA-176412                                                                                                | 0.00078109 | 0.01268543 |
| Cellular responses to stress_Homo sapiens_R-HSA-2262752                                                                                               | 0.00080274 | 0.01280012 |
| Complex I biogenesis_Homo sapiens_R-HSA-6799198                                                                                                       | 0.00081937 | 0.01283194 |
| Rev-mediated nuclear export of HIV RNA_Homo sapiens_R-HSA-165054                                                                                      | 0.00083623 | 0.01286616 |
| Mitochondrial iron-sulfur cluster biogenesis_Homo sapiens_R-HSA-1362409                                                                               | 0.00088714 | 0.01341417 |
| Diseases of signal transduction_Homo sapiens_R-HSA-5663202                                                                                            | 0.00097957 | 0.01385621 |
| Cell Cycle Checkpoints_Homo sapiens_R-HSA-69620                                                                                                       | 0.00097329 | 0.01385621 |
| Inactivation of APC/C via direct inhibition of the APC/C complex_Homo sapiens_R-HSA-141430                                                            | 0.00095894 | 0.01385621 |
| Inhibition of the proteolytic activity of APC/C required for the onset of anaphase by mitotic spindle checkpoint components_Homo sapiens_R-HSA-141405 | 0.00095894 | 0.01385621 |
| Interactions of Rev with host cellular proteins_Homo sapiens_R-HSA-177243                                                                             | 0.00110195 | 0.01510009 |
| Interactions of Vpr with host cellular proteins_Homo sapiens_R-HSA-176033                                                                             | 0.00110195 | 0.01510009 |
| Mitotic Spindle Checkpoint_Homo sapiens_R-HSA-69618                                                                                                   | 0.00116345 | 0.01569767 |
| Hh mutants that don't undergo autocatalytic processing are degraded by ERAD_Homo sapiens_R-HSA-5362768                                                | 0.00151491 | 0.02012998 |
| APC/C:Cdc20 mediated degradation of Cyclin B_Homo sapiens_R-HSA-174048                                                                                | 0.00166061 | 0.02173663 |
| Hh mutants abrogate ligand secretion_Homo sapiens_R-HSA-5387390                                                                                       | 0.00182545 | 0.02354296 |
| Post-translational protein modification_Homo sapiens_R-HSA-597592                                                                                     | 0.00202341 | 0.02535039 |
| CDT1 association with the CDC6:ORC:origin complex_Homo sapiens_R-HSA-68827                                                                            | 0.0019977  | 0.02535039 |

|                                                                                                 |            |            |
|-------------------------------------------------------------------------------------------------|------------|------------|
| APC-Cdc20 mediated degradation of Nek2A_Homo sapiens_R-HSA-179409                               | 0.0022887  | 0.0278776  |
| Post-translational modification: synthesis of GPI-anchored proteins_Homo sapiens_R-HSA-163125   | 0.0022887  | 0.0278776  |
| Glucose transport_Homo sapiens_R-HSA-70153                                                      | 0.00253517 | 0.03045676 |
| Gap-filling DNA repair synthesis and ligation in TC-NER_Homo sapiens_R-HSA-6782210              | 0.00281201 | 0.03207343 |
| Formation of HIV-1 elongation complex containing HIV-1 Tat_Homo sapiens_R-HSA-167200            | 0.00281603 | 0.03207343 |
| HIV Transcription Elongation_Homo sapiens_R-HSA-167169                                          | 0.00281603 | 0.03207343 |
| Tat-mediated elongation of the HIV-1 transcript_Homo sapiens_R-HSA-167246                       | 0.00281603 | 0.03207343 |
| SUMOylation of DNA replication proteins_Homo sapiens_R-HSA-4615885                              | 0.00311871 | 0.03295306 |
| Formation of HIV elongation complex in the absence of HIV Tat_Homo sapiens_R-HSA-167152         | 0.00311871 | 0.03295306 |
| Formation of RNA Pol II elongation complex_Homo sapiens_R-HSA-112382                            | 0.00311871 | 0.03295306 |
| RNA Polymerase II Transcription Elongation_Homo sapiens_R-HSA-75955                             | 0.00311871 | 0.03295306 |
| RNA Pol II CTD phosphorylation and interaction with CE_Homo sapiens_R-HSA-167160                | 0.00306351 | 0.03295306 |
| RNA Pol II CTD phosphorylation and interaction with CE_Homo sapiens_R-HSA-77075                 | 0.00306351 | 0.03295306 |
| SUMOylation of RNA binding proteins_Homo sapiens_R-HSA-4570464                                  | 0.00344414 | 0.03595851 |
| Cellular Senescence_Homo sapiens_R-HSA-2559583                                                  | 0.00386677 | 0.03989596 |
| mRNA Capping_Homo sapiens_R-HSA-72086                                                           | 0.00400031 | 0.04079383 |
| Apoptosis_Homo sapiens_R-HSA-109581                                                             | 0.00421922 | 0.04253164 |
| Hexose transport_Homo sapiens_R-HSA-189200                                                      | 0.00456636 | 0.04400767 |
| NEP/NS2 Interacts with the Cellular Export Machinery_Homo sapiens_R-HSA-168333                  | 0.00453404 | 0.04400767 |
| Regulation of Glucokinase by Glucokinase Regulatory Protein_Homo sapiens_R-HSA-170822           | 0.00453404 | 0.04400767 |
| Transport of Ribonucleoproteins into the Host Nucleus_Homo sapiens_R-HSA-168271                 | 0.00453404 | 0.04400767 |
| Programmed Cell Death_Homo sapiens_R-HSA-5357801                                                | 0.00479491 | 0.04570798 |
| RNA Polymerase I, RNA Polymerase III, and Mitochondrial Transcription_Homo sapiens_R-HSA-504046 | 0.00505043 | 0.04762614 |
| Export of Viral Ribonucleoproteins from Nucleus_Homo sapiens_R-HSA-168274                       | 0.00511369 | 0.04770962 |
| Metabolism of non-coding RNA_Homo sapiens_R-HSA-194441                                          | 0.00544534 | 0.04974545 |
| snRNP Assembly_Homo sapiens_R-HSA-191859                                                        | 0.00544534 | 0.04974545 |

**Supplementary Table 5. List of differentially expressed genes in trisomy 21 versus normal embryos.**

Gene symbols, gene descriptions and average FPKM values, fold changes, P-values and adjusted P-values of genes differentially expressed in trisomy 21 versus normal embryos.

| Gene Symbol      | Log2 fold-change | pvalue      | Adjusted-pvalue | Chromosome | Description                                                                                      |
|------------------|------------------|-------------|-----------------|------------|--------------------------------------------------------------------------------------------------|
| GREM1            | 4.96             | 8.80E-11    | 1.46E-06        | chr15      | gremlin 1, DAN family BMP antagonist [Source:HGNC Symbol;Acc:HGNC:2001]                          |
| FN1              | 4.28             | 1.05E-08    | 8.74E-05        | chr2       | fibronectin 1 [Source:HGNC Symbol;Acc:HGNC:3778]                                                 |
| GNLY             | 4.22             | 7.10E-08    | 0.000393194     | chr2       | granulysin [Source:HGNC Symbol;Acc:HGNC:4414]                                                    |
| B2M              | 3.89             | 1.99E-07    | 0.000824767     | chr15      | beta-2-microglobulin [Source:HGNC Symbol;Acc:HGNC:914]                                           |
| IGFBP5           | 3.77             | 8.81E-07    | 0.002438159     | chr2       | insulin-like growth factor binding protein 5 [Source:HGNC Symbol;Acc:HGNC:5474]                  |
| HLA-B            | 3.58             | 1.93E-06    | 0.004007652     | chr6       | major histocompatibility complex, class I, B [Source:HGNC Symbol;Acc:HGNC:4932]                  |
| IGFBP7           | 3.43             | 3.69E-07    | 0.001226268     | chr4       | insulin-like growth factor binding protein 7 [Source:HGNC Symbol;Acc:HGNC:5476]                  |
| SCG5             | 3.33             | 1.83E-05    | 0.022191521     | chr15      | secretogranin V [Source:HGNC Symbol;Acc:HGNC:10816]                                              |
| IFI27            | 3.31             | 3.35E-06    | 0.006175273     | chr14      | interferon, alpha-inducible protein 27 [Source:HGNC Symbol;Acc:HGNC:5397]                        |
| ZFPM2            | 3.17             | 5.33E-05    | 0.033533434     | chr8       | zinc finger protein, FOG family member 2 [Source:HGNC Symbol;Acc:HGNC:16700]                     |
| TCL1A            | 3.13             | 3.78E-05    | 0.029930957     | chr14      | T-cell leukemia/lymphoma 1A [Source:HGNC Symbol;Acc:HGNC:11648]                                  |
| TIMP1            | 3.12             | 3.27E-05    | 0.027135326     | chrX       | TIMP metalloproteinase inhibitor 1 [Source:HGNC Symbol;Acc:HGNC:11820]                           |
| TMEM45A          | 3.00             | 2.68E-05    | 0.023422422     | chr3       | transmembrane protein 45A [Source:HGNC Symbol;Acc:HGNC:25480]                                    |
| EMP3             | 2.97             | 0.000106072 | 0.046359222     | chr19      | epithelial membrane protein 3 [Source:HGNC Symbol;Acc:HGNC:3335]                                 |
| MT1E             | 2.93             | 9.13E-05    | 0.042105669     | chr16      | metallothionein 1E [Source:HGNC Symbol;Acc:HGNC:7397]                                            |
| HLA-A            | 2.89             | 9.78E-05    | 0.043911941     | chr6       | major histocompatibility complex, class I, A [Source:HGNC Symbol;Acc:HGNC:4931]                  |
| MTND6P4          | 2.58             | 1.90E-05    | 0.022191521     | chr5       | MT-ND6 pseudogene 4 [Source:HGNC Symbol;Acc:HGNC:39467]                                          |
| RP11-632C17__A.1 | 2.56             | 2.22E-05    | 0.022191521     | chr6       |                                                                                                  |
| THBS1            | 2.38             | 1.00E-05    | 0.016680788     | chr15      | thrombospondin 1 [Source:HGNC Symbol;Acc:HGNC:11785]                                             |
| ARMC2            | 2.03             | 5.95E-05    | 0.034170245     | chr6       | armadillo repeat containing 2 [Source:HGNC Symbol;Acc:HGNC:23045]                                |
| HTRA1            | 1.91             | 8.88E-05    | 0.042105669     | chr10      | HtrA serine peptidase 1 [Source:HGNC Symbol;Acc:HGNC:9476]                                       |
| DNAJC28          | 1.82             | 4.36E-05    | 0.031488519     | chr21      | DnaJ (Hsp40) homolog, subfamily C, member 28 [Source:HGNC Symbol;Acc:HGNC:1297]                  |
| CCNB1IP1         | 1.69             | 1.04E-06    | 0.002466107     | chr14      | cyclin B1 interacting protein 1, E3 ubiquitin protein ligase [Source:HGNC Symbol;Acc:HGNC:19437] |
| MZT2A            | 1.55             | 7.61E-05    | 0.03947812      | chr2       | mitotic spindle organizing protein 2A [Source:HGNC Symbol;Acc:HGNC:33187]                        |
| PKIG             | 1.44             | 2.40E-05    | 0.022191521     | chr20      | protein kinase (cAMP-dependent, catalytic) inhibitor gamma [Source:HGNC Symbol;Acc:HGNC:9019]    |

|           |       |          |             |       |                                                                                                                    |
|-----------|-------|----------|-------------|-------|--------------------------------------------------------------------------------------------------------------------|
| PBK       | 1.28  | 5.97E-05 | 0.034170245 | chr8  | PDZ binding kinase [Source:HGNC Symbol;Acc:HGNC:18282]                                                             |
| USP16     | 1.07  | 4.26E-05 | 0.031488519 | chr21 | ubiquitin specific peptidase 16 [Source:HGNC Symbol;Acc:HGNC:12614]                                                |
| UBAP2L    | -1.00 | 5.45E-05 | 0.033533434 | chr1  | ubiquitin associated protein 2-like [Source:HGNC Symbol;Acc:HGNC:29877]                                            |
| CDC6      | -1.06 | 5.14E-05 | 0.033533434 | chr17 | cell division cycle 6 [Source:HGNC Symbol;Acc:HGNC:1744]                                                           |
| KIAA0368  | -1.14 | 8.21E-05 | 0.040111728 | chr9  | KIAA0368 [Source:HGNC Symbol;Acc:HGNC:29020]                                                                       |
| NLN       | -1.19 | 4.82E-05 | 0.033337875 | chr5  | neurolysin (metallopeptidase M3 family) [Source:HGNC Symbol;Acc:HGNC:16058]                                        |
| RNF10     | -1.31 | 6.80E-05 | 0.036404795 | chr12 | ring finger protein 10 [Source:HGNC Symbol;Acc:HGNC:10055]                                                         |
| SLC25A23  | -1.34 | 2.22E-05 | 0.022191521 | chr19 | solute carrier family 25 (mitochondrial carrier; phosphate carrier), member 23 [Source:HGNC Symbol;Acc:HGNC:19375] |
| TRAF7     | -1.65 | 2.41E-05 | 0.022191521 | chr16 | TNF receptor-associated factor 7, E3 ubiquitin protein ligase [Source:HGNC Symbol;Acc:HGNC:20456]                  |
| GRK6      | -2.02 | 2.35E-05 | 0.022191521 | chr5  | G protein-coupled receptor kinase 6 [Source:HGNC Symbol;Acc:HGNC:4545]                                             |
| RAB11FIP4 | -2.05 | 1.93E-05 | 0.022191521 | chr17 | RAB11 family interacting protein 4 (class II) [Source:HGNC Symbol;Acc:HGNC:30267]                                  |
| ANXA6     | -2.53 | 7.96E-05 | 0.04004525  | chr5  | annexin A6 [Source:HGNC Symbol;Acc:HGNC:544]                                                                       |

**Supplementary Table 6. List of enriched pathways (monosomies).** P-values, adjusted P-values and enrichment scores of significantly enriched pathways in the list of genes that are frequently deregulated in monosomies.

| <b>Term</b>                                                                                                                                   | <b>P-value</b> | <b>Adjusted P-value</b> |
|-----------------------------------------------------------------------------------------------------------------------------------------------|----------------|-------------------------|
| Respiratory electron transport, ATP synthesis by chemiosmotic coupling, and heat production by uncoupling proteins._Homo sapiens_R-HSA-163200 | 3.75794E-38    | 4.62978E-35             |
| Gene Expression_Homo sapiens_R-HSA-74160                                                                                                      | 2.10258E-36    | 1.29519E-33             |
| The citric acid (TCA) cycle and respiratory electron transport_Homo sapiens_R-HSA-1428517                                                     | 2.47654E-33    | 8.95797E-31             |
| Respiratory electron transport_Homo sapiens_R-HSA-611105                                                                                      | 2.90843E-33    | 8.95797E-31             |
| Infectious disease_Homo sapiens_R-HSA-5663205                                                                                                 | 5.7498E-28     | 1.41675E-25             |
| Metabolism of proteins_Homo sapiens_R-HSA-392499                                                                                              | 6.4649E-23     | 1.32746E-20             |
| Complex I biogenesis_Homo sapiens_R-HSA-6799198                                                                                               | 2.60759E-21    | 4.58936E-19             |
| HIV Infection_Homo sapiens_R-HSA-162906                                                                                                       | 2.64868E-20    | 4.07896E-18             |
| Cell Cycle, Mitotic_Homo sapiens_R-HSA-69278                                                                                                  | 5.21818E-20    | 7.14311E-18             |
| Translation_Homo sapiens_R-HSA-72766                                                                                                          | 8.04791E-19    | 9.91502E-17             |
| Cell Cycle_Homo sapiens_R-HSA-1640170                                                                                                         | 3.17161E-18    | 3.5522E-16              |
| Metabolism_Homo sapiens_R-HSA-1430728                                                                                                         | 3.73606E-18    | 3.83569E-16             |
| rRNA processing_Homo sapiens_R-HSA-72312                                                                                                      | 2.26827E-17    | 2.14962E-15             |
| Major pathway of rRNA processing in the nucleolus_Homo sapiens_R-HSA-6791226                                                                  | 2.75232E-17    | 2.34278E-15             |
| SRP-dependent cotranslational protein targeting to membrane_Homo sapiens_R-HSA-1799339                                                        | 2.85241E-17    | 2.34278E-15             |
| G1/S Transition_Homo sapiens_R-HSA-69206                                                                                                      | 3.88858E-17    | 2.99421E-15             |
| DNA Replication_Homo sapiens_R-HSA-69306                                                                                                      | 7.56708E-17    | 5.4839E-15              |
| S Phase_Homo sapiens_R-HSA-69242                                                                                                              | 1.39151E-16    | 9.52411E-15             |
| Assembly of the pre-replicative complex_Homo sapiens_R-HSA-68867                                                                              | 1.89362E-16    | 1.22787E-14             |
| Regulation of DNA replication_Homo sapiens_R-HSA-69304                                                                                        | 2.46628E-16    | 1.51923E-14             |
| Removal of licensing factors from origins_Homo sapiens_R-HSA-69300                                                                            | 3.88132E-16    | 2.20109E-14             |
| Mitotic G1-G1/S phases_Homo sapiens_R-HSA-453279                                                                                              | 3.93052E-16    | 2.20109E-14             |
| Synthesis of DNA_Homo sapiens_R-HSA-69239                                                                                                     | 5.91269E-16    | 3.16715E-14             |
| M Phase_Homo sapiens_R-HSA-68886                                                                                                              | 9.20274E-16    | 4.72407E-14             |
| DNA Replication Pre-Initiation_Homo sapiens_R-HSA-69002                                                                                       | 1.19168E-15    | 5.64672E-14             |
| M/G1 Transition_Homo sapiens_R-HSA-68874                                                                                                      | 1.19168E-15    | 5.64672E-14             |
| Influenza Life Cycle_Homo sapiens_R-HSA-168255                                                                                                | 1.97286E-15    | 9.00209E-14             |
| Metabolism of amino acids and derivatives_Homo sapiens_R-HSA-71291                                                                            | 2.06462E-15    | 9.08431E-14             |
| Mitochondrial translation elongation_Homo sapiens_R-HSA-5389840                                                                               | 3.10838E-15    | 1.27651E-13             |
| Mitochondrial translation initiation_Homo sapiens_R-HSA-5368286                                                                               | 3.10838E-15    | 1.27651E-13             |
| Mitotic Anaphase_Homo sapiens_R-HSA-68882                                                                                                     | 4.52766E-15    | 1.79938E-13             |
| CDT1 association with the CDC6:ORC:origin complex_Homo sapiens_R-HSA-68827                                                                    | 5.70715E-15    | 2.19725E-13             |
| Mitotic Metaphase and Anaphase_Homo sapiens_R-HSA-2555396                                                                                     | 6.00246E-15    | 2.24092E-13             |
| Mitochondrial translation_Homo sapiens_R-HSA-5368287                                                                                          | 7.14857E-15    | 2.59031E-13             |
| Orc1 removal from chromatin_Homo sapiens_R-HSA-68949                                                                                          | 8.43789E-15    | 2.88763E-13             |
| Switching of origins to a post-replicative state_Homo sapiens_R-HSA-69052                                                                     | 8.43789E-15    | 2.88763E-13             |
| Influenza Infection_Homo sapiens_R-HSA-168254                                                                                                 | 1.45043E-14    | 4.82954E-13             |

|                                                                                                                                    |             |             |
|------------------------------------------------------------------------------------------------------------------------------------|-------------|-------------|
| Influenza Viral RNA Transcription and Replication_Homo sapiens_R-HSA-168273                                                        | 1.58722E-14 | 5.14594E-13 |
| Mitochondrial translation termination_Homo sapiens_R-HSA-5419276                                                                   | 2.08495E-14 | 6.58629E-13 |
| Cyclin E associated events during G1/S transition_Homo sapiens_R-HSA-69202                                                         | 2.29074E-14 | 7.05547E-13 |
| GTP hydrolysis and joining of the 60S ribosomal subunit_Homo sapiens_R-HSA-72706                                                   | 3.40537E-14 | 1.02327E-12 |
| Cyclin A:Cdk2-associated events at S phase entry_Homo sapiens_R-HSA-69656                                                          | 3.84311E-14 | 1.12731E-12 |
| SCF-beta-TrCP mediated degradation of Emi1_Homo sapiens_R-HSA-174113                                                               | 4.23717E-14 | 1.214E-12   |
| Autodegradation of Cdh1 by Cdh1:APC/C_Homo sapiens_R-HSA-174084                                                                    | 5.80186E-14 | 1.62452E-12 |
| APC/C:Cdc20 mediated degradation of mitotic proteins_Homo sapiens_R-HSA-176409                                                     | 6.27798E-14 | 1.68141E-12 |
| APC/C:Cdc20 mediated degradation of Securin_Homo sapiens_R-HSA-174154                                                              | 6.21841E-14 | 1.68141E-12 |
| Hh mutants that don't undergo autocatalytic processing are degraded by ERAD_Homo sapiens_R-HSA-5362768                             | 7.76723E-14 | 2.036E-12   |
| Cap-dependent Translation Initiation_Homo sapiens_R-HSA-72737                                                                      | 8.15499E-14 | 2.0504E-12  |
| Eukaryotic Translation Initiation_Homo sapiens_R-HSA-72613                                                                         | 8.15499E-14 | 2.0504E-12  |
| Regulation of APC/C activators between G1/S and early anaphase_Homo sapiens_R-HSA-176408                                           | 9.45933E-14 | 2.33078E-12 |
| APC/C:Cdh1 mediated degradation of Cdc20 and other APC/C:Cdh1 targeted proteins in late mitosis/early G1_Homo sapiens_R-HSA-174178 | 1.04309E-13 | 2.4247E-12  |
| Activation of APC/C and APC/C:Cdc20 mediated degradation of mitotic proteins_Homo sapiens_R-HSA-176814                             | 1.0085E-13  | 2.4247E-12  |
| Cdc20:Phospho-APC/C mediated degradation of Cyclin A_Homo sapiens_R-HSA-174184                                                     | 1.04309E-13 | 2.4247E-12  |
| 3' -UTR-mediated translational regulation_Homo sapiens_R-HSA-157279                                                                | 1.26452E-13 | 2.83252E-12 |
| L13a-mediated translational silencing of Ceruloplasmin expression_Homo sapiens_R-HSA-156827                                        | 1.26452E-13 | 2.83252E-12 |
| Degradation of DVL_Homo sapiens_R-HSA-4641258                                                                                      | 1.39795E-13 | 3.0755E-12  |
| Hedgehog ligand biogenesis_Homo sapiens_R-HSA-5358346                                                                              | 1.68791E-13 | 3.58798E-12 |
| APC:Cdc20 mediated degradation of cell cycle proteins prior to satisfaction of the cell cycle checkpoint_Homo sapiens_R-HSA-179419 | 1.68915E-13 | 3.58798E-12 |
| APC/C-mediated degradation of cell cycle proteins_Homo sapiens_R-HSA-174143                                                        | 2.03819E-13 | 4.18507E-12 |
| Regulation of mitotic cell cycle_Homo sapiens_R-HSA-453276                                                                         | 2.03819E-13 | 4.18507E-12 |
| Disease_Homo sapiens_R-HSA-1643685                                                                                                 | 2.41558E-13 | 4.87867E-12 |
| Hh mutants abrogate ligand secretion_Homo sapiens_R-HSA-5387390                                                                    | 2.4727E-13  | 4.91349E-12 |
| Separation of Sister Chromatids_Homo sapiens_R-HSA-2467813                                                                         | 2.56488E-13 | 5.01577E-12 |
| Dectin-1 mediated noncanonical NF-kB signaling_Homo sapiens_R-HSA-5607761                                                          | 2.70983E-13 | 5.21642E-12 |
| AUF1 (hnRNP D0) binds and destabilizes mRNA_Homo sapiens_R-HSA-450408                                                              | 3.81373E-13 | 7.22848E-12 |
| NIK-->noncanonical NF-kB signaling_Homo sapiens_R-HSA-5676590                                                                      | 4.30215E-13 | 8.03068E-12 |
| Selenocysteine synthesis_Homo sapiens_R-HSA-2408557                                                                                | 4.6527E-13  | 8.55541E-12 |
| Vpu mediated degradation of CD4_Homo sapiens_R-HSA-180534                                                                          | 5.78118E-13 | 1.04741E-11 |
| Selenoamino acid metabolism_Homo sapiens_R-HSA-2408522                                                                             | 7.32311E-13 | 1.30755E-11 |
| Regulation of activated PAK-2p34 by proteasome mediated degradation_Homo sapiens_R-HSA-211733                                      | 1.57803E-12 | 2.77734E-11 |
| Regulation of mRNA stability by proteins that bind AU-rich elements_Homo sapiens_R-HSA-450531                                      | 1.81101E-12 | 3.14248E-11 |
| Vif-mediated degradation of APOBEC3G_Homo sapiens_R-HSA-180585                                                                     | 1.83893E-12 | 3.14661E-11 |
| ER-Phagosome pathway_Homo sapiens_R-HSA-1236974                                                                                    | 2.04232E-12 | 3.44677E-11 |
| Formation of a pool of free 40S subunits_Homo sapiens_R-HSA-72689                                                                  | 2.61014E-12 | 4.34554E-11 |



|                                                                                                        |             |             |
|--------------------------------------------------------------------------------------------------------|-------------|-------------|
| Regulation of Apoptosis_Homo sapiens_R-HSA-169911                                                      | 2.84123E-12 | 4.48768E-11 |
| CDK-mediated phosphorylation and removal of Cdc6_Homo sapiens_R-HSA-69017                              | 2.84123E-12 | 4.48768E-11 |
| Ubiquitin-dependent degradation of Cyclin D1_Homo sapiens_R-HSA-69229                                  | 2.84123E-12 | 4.48768E-11 |
| Ubiquitin-dependent degradation of Cyclin D_Homo sapiens_R-HSA-75815                                   | 2.84123E-12 | 4.48768E-11 |
| HIV Life Cycle_Homo sapiens_R-HSA-162587                                                               | 3.77871E-12 | 5.89287E-11 |
| Viral mRNA Translation_Homo sapiens_R-HSA-192823                                                       | 4.7102E-12  | 7.25372E-11 |
| Autodegradation of the E3 ubiquitin ligase COP1_Homo sapiens_R-HSA-349425                              | 5.01729E-12 | 7.63124E-11 |
| Degradation of GLI2 by the proteasome_Homo sapiens_R-HSA-5610783                                       | 5.59998E-12 | 8.11668E-11 |
| GLI3 is processed to GLI3R by the proteasome_Homo sapiens_R-HSA-5610785                                | 5.59998E-12 | 8.11668E-11 |
| Degradation of GLI1 by the proteasome_Homo sapiens_R-HSA-5610780                                       | 5.59998E-12 | 8.11668E-11 |
| SCF(Skp2)-mediated degradation of p27/p21_Homo sapiens_R-HSA-187577                                    | 5.59998E-12 | 8.11668E-11 |
| Nonsense Mediated Decay (NMD) independent of the Exon Junction Complex (EJC)_Homo sapiens_R-HSA-975956 | 5.70738E-12 | 8.17616E-11 |
| p53-Independent DNA Damage Response_Homo sapiens_R-HSA-69610                                           | 8.69928E-12 | 1.20421E-10 |
| p53-Independent G1/S DNA damage checkpoint_Homo sapiens_R-HSA-69613                                    | 8.69928E-12 | 1.20421E-10 |
| Ubiquitin Mediated Degradation of Phosphorylated Cdc25A_Homo sapiens_R-HSA-69601                       | 8.69928E-12 | 1.20421E-10 |
| Host Interactions of HIV factors_Homo sapiens_R-HSA-162909                                             | 9.42899E-12 | 1.29072E-10 |
| Eukaryotic Translation Termination_Homo sapiens_R-HSA-72764                                            | 1.46576E-11 | 1.98442E-10 |
| Nonsense Mediated Decay (NMD) enhanced by the Exon Junction Complex (EJC)_Homo sapiens_R-HSA-975957    | 1.57821E-11 | 2.0907E-10  |
| Nonsense-Mediated Decay (NMD)_Homo sapiens_R-HSA-927802                                                | 1.57821E-11 | 2.0907E-10  |
| Apoptosis_Homo sapiens_R-HSA-109581                                                                    | 1.88994E-11 | 2.47702E-10 |
| Activation of NF-kappaB in B cells_Homo sapiens_R-HSA-1169091                                          | 2.17469E-11 | 2.82022E-10 |
| Degradation of AXIN_Homo sapiens_R-HSA-4641257                                                         | 2.48524E-11 | 3.15651E-10 |
| Stabilization of p53_Homo sapiens_R-HSA-69541                                                          | 2.48524E-11 | 3.15651E-10 |
| Peptide chain elongation_Homo sapiens_R-HSA-156902                                                     | 2.60169E-11 | 3.27069E-10 |
| Eukaryotic Translation Elongation_Homo sapiens_R-HSA-156842                                            | 3.01704E-11 | 3.75454E-10 |
| CLEC7A (Dectin-1) signaling_Homo sapiens_R-HSA-5607764                                                 | 3.67724E-11 | 4.53036E-10 |
| Asymmetric localization of PCP proteins_Homo sapiens_R-HSA-4608870                                     | 3.71713E-11 | 4.53416E-10 |
| Programmed Cell Death_Homo sapiens_R-HSA-5357801                                                       | 3.85434E-11 | 4.65544E-10 |
| Degradation of beta-catenin by the destruction complex_Homo sapiens_R-HSA-195253                       | 6.67581E-11 | 7.98504E-10 |
| Processing of Capped Intron-Containing Pre-mRNA_Homo sapiens_R-HSA-72203                               | 1.08125E-10 | 1.28086E-09 |
| Cross-presentation of soluble exogenous antigens (endosomes)_Homo sapiens_R-HSA-1236978                | 1.09742E-10 | 1.28764E-09 |
| Late Phase of HIV Life Cycle_Homo sapiens_R-HSA-162599                                                 | 1.21098E-10 | 1.40748E-09 |
| tRNA processing_Homo sapiens_R-HSA-72306                                                               | 1.30766E-10 | 1.50565E-09 |
| Regulation of ornithine decarboxylase (ODC)_Homo sapiens_R-HSA-350562                                  | 1.83026E-10 | 2.08785E-09 |
| The role of GTSE1 in G2/M progression after G2 checkpoint_Homo sapiens_R-HSA-8852276                   | 2.64551E-10 | 2.99016E-09 |
| Antigen processing-Cross presentation_Homo sapiens_R-HSA-1236975                                       | 3.46483E-10 | 3.88061E-09 |
| MAPK6/MAPK4 signaling_Homo sapiens_R-HSA-5687128                                                       | 4.06709E-10 | 4.5141E-09  |
| mRNA Splicing - Major Pathway_Homo sapiens_R-HSA-72163                                                 | 5.65334E-10 | 6.21867E-09 |
| Ribosomal scanning and start codon recognition_Homo sapiens_R-HSA-72702                                | 7.04544E-10 | 7.68141E-09 |
| Regulation of RAS by GAPs_Homo sapiens_R-HSA-5658442                                                   | 1.17267E-09 | 1.26731E-08 |
| PCP/CE pathway_Homo sapiens_R-HSA-4086400                                                              | 1.36983E-09 | 1.4675E-08  |

|                                                                                                                                 |             |             |
|---------------------------------------------------------------------------------------------------------------------------------|-------------|-------------|
| p53-Dependent G1 DNA Damage Response_Homo sapiens_R-HSA-69563                                                                   | 1.40334E-09 | 1.47771E-08 |
| p53-Dependent G1/S DNA damage checkpoint_Homo sapiens_R-HSA-69580                                                               | 1.40334E-09 | 1.47771E-08 |
| Nucleotide Excision Repair_Homo sapiens_R-HSA-5696398                                                                           | 2.35962E-09 | 2.4636E-08  |
| G1/S DNA Damage Checkpoints_Homo sapiens_R-HSA-69615                                                                            | 3.03445E-09 | 3.14155E-08 |
| Metabolism of polyamines_Homo sapiens_R-HSA-351202                                                                              | 3.24869E-09 | 3.33532E-08 |
| Cell Cycle Checkpoints_Homo sapiens_R-HSA-69620                                                                                 | 3.78733E-09 | 3.85619E-08 |
| Translation initiation complex formation_Homo sapiens_R-HSA-72649                                                               | 4.3252E-09  | 4.36774E-08 |
| Formation of TC-NER Pre-Incision Complex_Homo sapiens_R-HSA-6781823                                                             | 4.97685E-09 | 4.98494E-08 |
| Transcription-Coupled Nucleotide Excision Repair (TC-NER)_Homo sapiens_R-HSA-6781827                                            | 5.51311E-09 | 5.47754E-08 |
| mRNA Splicing_Homo sapiens_R-HSA-72172                                                                                          | 5.76516E-09 | 5.68214E-08 |
| Activation of the mRNA upon binding of the cap-binding complex and eIFs, and subsequent binding to 43S_Homo sapiens_R-HSA-72662 | 6.45621E-09 | 6.31274E-08 |
| C-type lectin receptors (CLRs)_Homo sapiens_R-HSA-5621481                                                                       | 7.2551E-09  | 7.03802E-08 |
| Antigen processing: Ubiquitination & Proteasome degradation_Homo sapiens_R-HSA-983168                                           | 8.59533E-09 | 8.273E-08   |
| Mitotic G2-G2/M phases_Homo sapiens_R-HSA-453274                                                                                | 9.30641E-09 | 8.88798E-08 |
| G2/M Transition_Homo sapiens_R-HSA-69275                                                                                        | 1.93344E-08 | 1.8323E-07  |
| DNA Repair_Homo sapiens_R-HSA-73894                                                                                             | 1.9849E-08  | 1.86672E-07 |
| G2/M Checkpoints_Homo sapiens_R-HSA-69481                                                                                       | 2.0394E-08  | 1.90344E-07 |
| Class I MHC mediated antigen processing & presentation_Homo sapiens_R-HSA-983169                                                | 2.1078E-08  | 1.95249E-07 |
| tRNA processing in the nucleus_Homo sapiens_R-HSA-6784531                                                                       | 2.47377E-08 | 2.27439E-07 |
| Mitochondrial protein import_Homo sapiens_R-HSA-1268020                                                                         | 4.39049E-08 | 4.00672E-07 |
| Formation of ATP by chemiosmotic coupling_Homo sapiens_R-HSA-163210                                                             | 4.50288E-08 | 4.07908E-07 |
| Formation of the ternary complex, and subsequently, the 43S complex_Homo sapiens_R-HSA-72695                                    | 5.24787E-08 | 4.71925E-07 |
| Downstream TCR signaling_Homo sapiens_R-HSA-202424                                                                              | 5.35495E-08 | 4.78065E-07 |
| Beta-catenin independent WNT signaling_Homo sapiens_R-HSA-3858494                                                               | 6.17416E-08 | 5.47235E-07 |
| Transcriptional Regulation by TP53_Homo sapiens_R-HSA-3700989                                                                   | 7.03898E-08 | 6.19431E-07 |
| TNFR2 non-canonical NF-kB pathway_Homo sapiens_R-HSA-5668541                                                                    | 7.43031E-08 | 6.4923E-07  |
| Hedgehog 'on' state_Homo sapiens_R-HSA-5632684                                                                                  | 8.29134E-08 | 7.19361E-07 |
| Gap-filling DNA repair synthesis and ligation in TC-NER_Homo sapiens_R-HSA-6782210                                              | 1.44495E-07 | 1.24488E-06 |
| Global Genome Nucleotide Excision Repair (GG-NER)_Homo sapiens_R-HSA-5696399                                                    | 1.49253E-07 | 1.27694E-06 |
| Signaling by Insulin receptor_Homo sapiens_R-HSA-74752                                                                          | 5.35416E-07 | 4.54919E-06 |
| Cellular responses to stress_Homo sapiens_R-HSA-2262752                                                                         | 5.83106E-07 | 4.92045E-06 |
| Membrane Trafficking_Homo sapiens_R-HSA-199991                                                                                  | 8.29232E-07 | 6.94976E-06 |
| FCERI mediated NF-kB activation_Homo sapiens_R-HSA-2871837                                                                      | 8.46521E-07 | 7.04671E-06 |
| HIV Transcription Initiation_Homo sapiens_R-HSA-167161                                                                          | 9.40423E-07 | 7.52339E-06 |
| RNA Polymerase II HIV Promoter Escape_Homo sapiens_R-HSA-167162                                                                 | 9.40423E-07 | 7.52339E-06 |
| RNA Polymerase II Promoter Escape_Homo sapiens_R-HSA-73776                                                                      | 9.40423E-07 | 7.52339E-06 |
| RNA Polymerase II Transcription Initiation And Promoter Clearance_Homo sapiens_R-HSA-76042                                      | 9.40423E-07 | 7.52339E-06 |
| RNA Polymerase II Transcription Initiation_Homo sapiens_R-HSA-75953                                                             | 9.40423E-07 | 7.52339E-06 |
| RNA Polymerase II Transcription Pre-Initiation And Promoter Opening_Homo sapiens_R-HSA-73779                                    | 9.40423E-07 | 7.52339E-06 |
| TP53 Regulates Metabolic Genes_Homo sapiens_R-HSA-5628897                                                                       | 9.83113E-07 | 7.81416E-06 |

|                                                                                                 |             |             |
|-------------------------------------------------------------------------------------------------|-------------|-------------|
| TCR signaling_Homo sapiens_R-HSA-202403                                                         | 1.09371E-06 | 8.63749E-06 |
| Cytosolic tRNA aminoacylation_Homo sapiens_R-HSA-379716                                         | 1.4335E-06  | 1.12489E-05 |
| Formation of the Early Elongation Complex_Homo sapiens_R-HSA-113418                             | 2.29565E-06 | 1.77877E-05 |
| Formation of the HIV-1 Early Elongation Complex_Homo sapiens_R-HSA-167158                       | 2.29565E-06 | 1.77877E-05 |
| Hedgehog 'off' state_Homo sapiens_R-HSA-5610787                                                 | 2.43494E-06 | 1.87491E-05 |
| Transferrin endocytosis and recycling_Homo sapiens_R-HSA-917977                                 | 2.49067E-06 | 1.9059E-05  |
| Organelle biogenesis and maintenance_Homo sapiens_R-HSA-1852241                                 | 2.78627E-06 | 2.11894E-05 |
| TCF dependent signaling in response to WNT_Homo sapiens_R-HSA-201681                            | 3.3844E-06  | 2.54553E-05 |
| Signaling by Hedgehog_Homo sapiens_R-HSA-5358351                                                | 3.38853E-06 | 2.54553E-05 |
| Dual incision in TC-NER_Homo sapiens_R-HSA-6782135                                              | 3.90478E-06 | 2.91557E-05 |
| Diseases of signal transduction_Homo sapiens_R-HSA-5663202                                      | 4.14953E-06 | 3.07965E-05 |
| Insulin receptor recycling_Homo sapiens_R-HSA-77387                                             | 4.18536E-06 | 3.08765E-05 |
| Post-translational protein modification_Homo sapiens_R-HSA-597592                               | 4.8849E-06  | 3.58226E-05 |
| RNA Pol II CTD phosphorylation and interaction with CE_Homo sapiens_R-HSA-167160                | 6.81243E-06 | 4.93701E-05 |
| RNA Pol II CTD phosphorylation and interaction with CE_Homo sapiens_R-HSA-77075                 | 6.81243E-06 | 4.93701E-05 |
| RNA Polymerase I, RNA Polymerase III, and Mitochondrial Transcription_Homo sapiens_R-HSA-504046 | 6.97247E-06 | 5.02344E-05 |
| Metabolism of non-coding RNA_Homo sapiens_R-HSA-194441                                          | 7.2851E-06  | 5.188E-05   |
| snRNP Assembly_Homo sapiens_R-HSA-191859                                                        | 7.2851E-06  | 5.188E-05   |
| RNA Polymerase II Transcription_Homo sapiens_R-HSA-73857                                        | 9.87017E-06 | 6.98853E-05 |
| tRNA Aminoacylation_Homo sapiens_R-HSA-379724                                                   | 1.2666E-05  | 8.9169E-05  |
| Asparagine N-linked glycosylation_Homo sapiens_R-HSA-446203                                     | 1.62672E-05 | 0.00011387  |
| mRNA Capping_Homo sapiens_R-HSA-72086                                                           | 1.66334E-05 | 0.000115776 |
| Iron uptake and transport_Homo sapiens_R-HSA-917937                                             | 1.75685E-05 | 0.000121598 |
| Signaling by Wnt_Homo sapiens_R-HSA-195721                                                      | 1.79925E-05 | 0.000123837 |
| Unfolded Protein Response (UPR)_Homo sapiens_R-HSA-381119                                       | 1.87859E-05 | 0.000128579 |
| RNA Polymerase II Pre-transcription Events_Homo sapiens_R-HSA-674695                            | 1.99421E-05 | 0.000135738 |
| RNA Polymerase I Promoter Escape_Homo sapiens_R-HSA-73772                                       | 2.50743E-05 | 0.000169734 |
| ER to Golgi Anterograde Transport_Homo sapiens_R-HSA-199977                                     | 3.07929E-05 | 0.000207305 |
| Synthesis of diphthamide-EEF2_Homo sapiens_R-HSA-5358493                                        | 3.12395E-05 | 0.000209169 |
| Mitophagy_Homo sapiens_R-HSA-5205647                                                            | 3.18862E-05 | 0.000210074 |
| Pink/Parkin Mediated Mitophagy_Homo sapiens_R-HSA-5205685                                       | 3.18862E-05 | 0.000210074 |
| mTORC1-mediated signalling_Homo sapiens_R-HSA-166208                                            | 3.18862E-05 | 0.000210074 |
| COPI-mediated anterograde transport_Homo sapiens_R-HSA-6807878                                  | 3.83396E-05 | 0.000251247 |
| Transcription of the HIV genome_Homo sapiens_R-HSA-167172                                       | 4.05676E-05 | 0.000263049 |
| Macroautophagy_Homo sapiens_R-HSA-1632852                                                       | 4.05676E-05 | 0.000263049 |
| Association of licensing factors with the pre-replicative complex_Homo sapiens_R-HSA-69298      | 4.82277E-05 | 0.000311081 |
| RNA Polymerase I Transcription Termination_Homo sapiens_R-HSA-73863                             | 5.35622E-05 | 0.000343691 |
| Chromosome Maintenance_Homo sapiens_R-HSA-73886                                                 | 5.92977E-05 | 0.000378522 |
| Endosomal Sorting Complex Required For Transport (ESCRT)_Homo sapiens_R-HSA-917729              | 6.66244E-05 | 0.0004231   |
| Formation of Incision Complex in GG-NER_Homo sapiens_R-HSA-5696395                              | 7.97146E-05 | 0.000493497 |
| Formation of HIV-1 elongation complex containing HIV-1 Tat_Homo sapiens_R-HSA-167200            | 7.97146E-05 | 0.000493497 |
| HIV Transcription Elongation_Homo sapiens_R-HSA-167169                                          | 7.97146E-05 | 0.000493497 |

|                                                                                              |             |             |
|----------------------------------------------------------------------------------------------|-------------|-------------|
| Tat-mediated elongation of the HIV-1 transcript_Homo sapiens_R-HSA-167246                    | 7.97146E-05 | 0.000493497 |
| Cyclin D associated events in G1_Homo sapiens_R-HSA-69231                                    | 8.01131E-05 | 0.000493497 |
| G1 Phase_Homo sapiens_R-HSA-69236                                                            | 8.01131E-05 | 0.000493497 |
| Vesicle-mediated transport_Homo sapiens_R-HSA-5653656                                        | 8.73798E-05 | 0.000535582 |
| Intra-Golgi and retrograde Golgi-to-ER traffic_Homo sapiens_R-HSA-6811442                    | 0.00010021  | 0.000611181 |
| Formation of HIV elongation complex in the absence of HIV Tat_Homo sapiens_R-HSA-167152      | 0.000105679 | 0.000635104 |
| Formation of RNA Pol II elongation complex_Homo sapiens_R-HSA-112382                         | 0.000105679 | 0.000635104 |
| RNA Polymerase II Transcription Elongation_Homo sapiens_R-HSA-75955                          | 0.000105679 | 0.000635104 |
| ROS, RNS production in response to bacteria_Homo sapiens_R-HSA-1222556                       | 0.000106477 | 0.000636792 |
| tRNA modification in the nucleus and cytosol_Homo sapiens_R-HSA-6782315                      | 0.000108671 | 0.000646775 |
| Budding and maturation of HIV virion_Homo sapiens_R-HSA-162588                               | 0.000119829 | 0.000709759 |
| RNA Polymerase I Chain Elongation_Homo sapiens_R-HSA-73777                                   | 0.000183998 | 0.001084622 |
| RNA Polymerase III Abortive And Retractive Initiation_Homo sapiens_R-HSA-749476              | 0.000192828 | 0.001125899 |
| RNA Polymerase III Transcription_Homo sapiens_R-HSA-74158                                    | 0.000192828 | 0.001125899 |
| RNA Polymerase III Transcription Initiation_Homo sapiens_R-HSA-76046                         | 0.000199012 | 0.001156523 |
| Downstream signaling events of B Cell Receptor (BCR)_Homo sapiens_R-HSA-1168372              | 0.000201379 | 0.001164786 |
| Insulin receptor signalling cascade_Homo sapiens_R-HSA-74751                                 | 0.000242449 | 0.001395783 |
| Viral Messenger RNA Synthesis_Homo sapiens_R-HSA-168325                                      | 0.000252605 | 0.001447485 |
| Prefoldin mediated transfer of substrate to CCT/TriC_Homo sapiens_R-HSA-389957               | 0.000253939 | 0.001448392 |
| Negative epigenetic regulation of rRNA expression_Homo sapiens_R-HSA-5250941                 | 0.000255152 | 0.001448605 |
| XBP1(S) activates chaperone genes_Homo sapiens_R-HSA-381038                                  | 0.000262676 | 0.001484482 |
| DNA strand elongation_Homo sapiens_R-HSA-69190                                               | 0.000269037 | 0.001513488 |
| Transport to the Golgi and subsequent modification_Homo sapiens_R-HSA-948021                 | 0.000332586 | 0.001862481 |
| IRS-mediated signalling_Homo sapiens_R-HSA-112399                                            | 0.000350757 | 0.00195535  |
| IRE1alpha activates chaperones_Homo sapiens_R-HSA-381070                                     | 0.000408552 | 0.002267277 |
| NRIF signals cell death from the nucleus_Homo sapiens_R-HSA-205043                           | 0.000422966 | 0.002336746 |
| mTOR signalling_Homo sapiens_R-HSA-165159                                                    | 0.00046103  | 0.002535667 |
| IGF1R signaling cascade_Homo sapiens_R-HSA-2428924                                           | 0.000487377 | 0.002645148 |
| IRS-related events triggered by IGF1R_Homo sapiens_R-HSA-2428928                             | 0.000487377 | 0.002645148 |
| Signaling by Type 1 Insulin-like Growth Factor 1 Receptor (IGF1R)_Homo sapiens_R-HSA-2404192 | 0.000487377 | 0.002645148 |
| COPII (Coat Protein 2) Mediated Vesicle Transport_Homo sapiens_R-HSA-204005                  | 0.000529134 | 0.002859182 |
| Nuclear Envelope Breakdown_Homo sapiens_R-HSA-2980766                                        | 0.000587032 | 0.00315818  |
| PKB-mediated events_Homo sapiens_R-HSA-109703                                                | 0.000596215 | 0.003193639 |
| Mitotic Prophase_Homo sapiens_R-HSA-68875                                                    | 0.000649275 | 0.003447872 |
| Mitotic Prometaphase_Homo sapiens_R-HSA-68877                                                | 0.000649275 | 0.003447872 |
| APC-Cdc20 mediated degradation of Nek2A_Homo sapiens_R-HSA-179409                            | 0.000659568 | 0.003487502 |
| Activation of the pre-replicative complex_Homo sapiens_R-HSA-68962                           | 0.000673462 | 0.00354575  |
| RHO GTPases Activate Formins_Homo sapiens_R-HSA-5663220                                      | 0.000687606 | 0.00360481  |
| mRNA Splicing - Minor Pathway_Homo sapiens_R-HSA-72165                                       | 0.000726532 | 0.003792743 |
| RNA Polymerase I Transcription Initiation_Homo sapiens_R-HSA-73762                           | 0.00084418  | 0.004388309 |
| Transcriptional regulation by small RNAs_Homo sapiens_R-HSA-5578749                          | 0.00106352  | 0.005505279 |
| Cooperation of Prefoldin and TriC/CCT in actin and tubulin folding_Homo sapiens_R-HSA-389958 | 0.001188717 | 0.006109323 |

|                                                                                                                                                       |             |             |
|-------------------------------------------------------------------------------------------------------------------------------------------------------|-------------|-------------|
| Assembly Of The HIV Virion_Homo sapiens_R-HSA-175474                                                                                                  | 0.001200046 | 0.006109323 |
| Initiation of Nuclear Envelope Reformation_Homo sapiens_R-HSA-2995383                                                                                 | 0.001200046 | 0.006109323 |
| Nuclear Envelope Reassembly_Homo sapiens_R-HSA-2995410                                                                                                | 0.001200046 | 0.006109323 |
| RHO GTPase Effectors_Homo sapiens_R-HSA-195258                                                                                                        | 0.001250026 | 0.006299582 |
| NoRC negatively regulates rRNA expression_Homo sapiens_R-HSA-427413                                                                                   | 0.001252758 | 0.006299582 |
| Signaling by TGF-beta Receptor Complex_Homo sapiens_R-HSA-170834                                                                                      | 0.001252758 | 0.006299582 |
| Signaling by the B Cell Receptor (BCR)_Homo sapiens_R-HSA-983705                                                                                      | 0.001283593 | 0.006428402 |
| Resolution of Sister Chromatid Cohesion_Homo sapiens_R-HSA-2500257                                                                                    | 0.001305372 | 0.006511003 |
| TP53 Regulates Transcription of DNA Repair Genes_Homo sapiens_R-HSA-6796648                                                                           | 0.001322692 | 0.006570795 |
| DNA Damage Recognition in GG-NER_Homo sapiens_R-HSA-5696394                                                                                           | 0.001386653 | 0.006860868 |
| Signalling by NGF_Homo sapiens_R-HSA-166520                                                                                                           | 0.001402984 | 0.006913905 |
| Rev-mediated nuclear export of HIV RNA_Homo sapiens_R-HSA-165054                                                                                      | 0.001546645 | 0.007561374 |
| E2F mediated regulation of DNA replication_Homo sapiens_R-HSA-113510                                                                                  | 0.001546645 | 0.007561374 |
| RNA Polymerase III Transcription Initiation From Type 1 Promoter_Homo sapiens_R-HSA-76061                                                             | 0.001666697 | 0.008116088 |
| Gene Silencing by RNA_Homo sapiens_R-HSA-211000                                                                                                       | 0.001700181 | 0.008150283 |
| Protein folding_Homo sapiens_R-HSA-391251                                                                                                             | 0.001700181 | 0.008150283 |
| Abortive elongation of HIV-1 transcript in the absence of Tat_Homo sapiens_R-HSA-167242                                                               | 0.001699822 | 0.008150283 |
| MicroRNA (miRNA) biogenesis_Homo sapiens_R-HSA-203927                                                                                                 | 0.001699822 | 0.008150283 |
| Gamma carboxylation, hypusine formation and arylsulfatase activation_Homo sapiens_R-HSA-163841                                                        | 0.00175029  | 0.008357974 |
| Epigenetic regulation of gene expression_Homo sapiens_R-HSA-212165                                                                                    | 0.001812978 | 0.008623895 |
| SUMOylation of RNA binding proteins_Homo sapiens_R-HSA-4570464                                                                                        | 0.00186853  | 0.008853957 |
| RNA Polymerase I Promoter Clearance_Homo sapiens_R-HSA-73854                                                                                          | 0.001999614 | 0.009438792 |
| Regulated proteolysis of p75NTR_Homo sapiens_R-HSA-193692                                                                                             | 0.002051098 | 0.009644857 |
| Golgi-to-ER retrograde transport_Homo sapiens_R-HSA-8856688                                                                                           | 0.002252064 | 0.010544572 |
| Translesion Synthesis by POLH_Homo sapiens_R-HSA-110320                                                                                               | 0.00226811  | 0.010544572 |
| Citric acid cycle (TCA cycle)_Homo sapiens_R-HSA-71403                                                                                                | 0.00226811  | 0.010544572 |
| DNA Double-Strand Break Repair_Homo sapiens_R-HSA-5693532                                                                                             | 0.002304744 | 0.010622911 |
| RNA polymerase II transcribes snRNA genes_Homo sapiens_R-HSA-6807505                                                                                  | 0.002319451 | 0.010622911 |
| Deposition of new CENPA-containing nucleosomes at the centromere_Homo sapiens_R-HSA-606279                                                            | 0.002315048 | 0.010622911 |
| Nucleosome assembly_Homo sapiens_R-HSA-774815                                                                                                         | 0.002315048 | 0.010622911 |
| Interactions of Rev with host cellular proteins_Homo sapiens_R-HSA-177243                                                                             | 0.002523478 | 0.011514536 |
| NEP/NS2 Interacts with the Cellular Export Machinery_Homo sapiens_R-HSA-168333                                                                        | 0.002845422 | 0.012935645 |
| Processive synthesis on the lagging strand_Homo sapiens_R-HSA-69183                                                                                   | 0.002908045 | 0.013171735 |
| RNA Polymerase I Transcription_Homo sapiens_R-HSA-73864                                                                                               | 0.003087962 | 0.013884559 |
| Glucose metabolism_Homo sapiens_R-HSA-70326                                                                                                           | 0.003087962 | 0.013884559 |
| Inactivation of APC/C via direct inhibition of the APC/C complex_Homo sapiens_R-HSA-141430                                                            | 0.003175773 | 0.014175912 |
| Inhibition of the proteolytic activity of APC/C required for the onset of anaphase by mitotic spindle checkpoint components_Homo sapiens_R-HSA-141405 | 0.003175773 | 0.014175912 |
| MAPK family signaling cascades_Homo sapiens_R-HSA-5683057                                                                                             | 0.003432859 | 0.015118395 |
| Membrane binding and targetting of GAG proteins_Homo sapiens_R-HSA-174490                                                                             | 0.003435999 | 0.015118395 |
| Synthesis And Processing Of GAG, GAGPOL Polyproteins_Homo sapiens_R-HSA-174495                                                                        | 0.003435999 | 0.015118395 |

|                                                                                                             |             |             |
|-------------------------------------------------------------------------------------------------------------|-------------|-------------|
| Processive synthesis on the C-strand of the telomere_Homo sapiens_R-HSA-174414                              | 0.003435999 | 0.015118395 |
| Export of Viral Ribonucleoproteins from Nucleus_Homo sapiens_R-HSA-168274                                   | 0.003640738 | 0.015962237 |
| Signalling to p38 via RIT and RIN_Homo sapiens_R-HSA-187706                                                 | 0.003697687 | 0.016154436 |
| Transport of Mature Transcript to Cytoplasm_Homo sapiens_R-HSA-72202                                        | 0.003834851 | 0.016694475 |
| COPI-dependent Golgi-to-ER retrograde traffic_Homo sapiens_R-HSA-6811434                                    | 0.004056324 | 0.017596448 |
| Transport of Mature mRNA derived from an Intron-Containing Transcript_Homo sapiens_R-HSA-159236             | 0.004121636 | 0.017817037 |
| Chaperonin-mediated protein folding_Homo sapiens_R-HSA-390466                                               | 0.004336372 | 0.01861467  |
| Mitotic Spindle Checkpoint_Homo sapiens_R-HSA-69618                                                         | 0.004336342 | 0.01861467  |
| Signaling by Rho GTPases_Homo sapiens_R-HSA-194315                                                          | 0.004517689 | 0.019325671 |
| Adaptive Immune System_Homo sapiens_R-HSA-1280218                                                           | 0.004548303 | 0.019389304 |
| GRB2 events in EGFR signaling_Homo sapiens_R-HSA-179812                                                     | 0.004815374 | 0.020110309 |
| RAF/MAP kinase cascade_Homo sapiens_R-HSA-5673001                                                           | 0.004815374 | 0.020110309 |
| SHC1 events in EGFR signaling_Homo sapiens_R-HSA-180336                                                     | 0.004815374 | 0.020110309 |
| SHC1 events in ERBB4 signaling_Homo sapiens_R-HSA-1250347                                                   | 0.004815374 | 0.020110309 |
| SOS-mediated signalling_Homo sapiens_R-HSA-112412                                                           | 0.004815374 | 0.020110309 |
| Deadenylation-dependent mRNA decay_Homo sapiens_R-HSA-429914                                                | 0.004813832 | 0.020110309 |
| Transcriptional activity of SMAD2/SMAD3:SMAD4 heterotrimer_Homo sapiens_R-HSA-2173793                       | 0.004903353 | 0.020339836 |
| SUMOylation of DNA replication proteins_Homo sapiens_R-HSA-4615885                                          | 0.004903353 | 0.020339836 |
| Signaling by Leptin_Homo sapiens_R-HSA-2586552                                                              | 0.004930737 | 0.020384793 |
| FRS-mediated FGFR1 signaling_Homo sapiens_R-HSA-5654693                                                     | 0.005172339 | 0.021100404 |
| FRS-mediated FGFR2 signaling_Homo sapiens_R-HSA-5654700                                                     | 0.005172339 | 0.021100404 |
| FRS-mediated FGFR3 signaling_Homo sapiens_R-HSA-5654706                                                     | 0.005172339 | 0.021100404 |
| FRS-mediated FGFR4 signaling_Homo sapiens_R-HSA-5654712                                                     | 0.005172339 | 0.021100404 |
| RNA Polymerase III Transcription Initiation From Type 2 Promoter_Homo sapiens_R-HSA-76066                   | 0.005254478 | 0.021364744 |
| Signaling by ERBB4_Homo sapiens_R-HSA-1236394                                                               | 0.005292487 | 0.0214485   |
| Unwinding of DNA_Homo sapiens_R-HSA-176974                                                                  | 0.005383746 | 0.021746804 |
| Interleukin receptor SHC signaling_Homo sapiens_R-HSA-912526                                                | 0.005667833 | 0.022819509 |
| Transport of the SLBP independent Mature mRNA_Homo sapiens_R-HSA-159227                                     | 0.005745316 | 0.022981265 |
| Cargo concentration in the ER_Homo sapiens_R-HSA-5694530                                                    | 0.005745316 | 0.022981265 |
| Signalling to ERKs_Homo sapiens_R-HSA-187687                                                                | 0.005772938 | 0.023012967 |
| Cyclin A/B1 associated events during G2/M transition_Homo sapiens_R-HSA-69273                               | 0.0057906   | 0.023012967 |
| Dual Incision in GG-NER_Homo sapiens_R-HSA-5696400                                                          | 0.005923155 | 0.023464073 |
| G1/S-Specific Transcription_Homo sapiens_R-HSA-69205                                                        | 0.005979897 | 0.023612926 |
| Insulin-like Growth Factor-2 mRNA Binding Proteins (IGF2BPs/IMPs/VICKZs) bind RNA_Homo sapiens_R-HSA-428359 | 0.006032776 | 0.023745623 |
| Signalling to RAS_Homo sapiens_R-HSA-167044                                                                 | 0.006069938 | 0.023815808 |
| Signaling by SCF-KIT_Homo sapiens_R-HSA-1433557                                                             | 0.006289085 | 0.02459731  |
| rRNA modification in the nucleus_Homo sapiens_R-HSA-6790901                                                 | 0.006345504 | 0.024739432 |
| ARMS-mediated activation_Homo sapiens_R-HSA-170984                                                          | 0.00638018  | 0.024796156 |
| NGF signalling via TRKA from the plasma membrane_Homo sapiens_R-HSA-187037                                  | 0.006660366 | 0.025803682 |
| RNA Polymerase III Transcription Initiation From Type 3 Promoter_Homo sapiens_R-HSA-76071                   | 0.006689591 | 0.025835662 |
| Frs2-mediated activation_Homo sapiens_R-HSA-170968                                                          | 0.006832049 | 0.026303387 |
| VEGFR2 mediated cell proliferation_Homo sapiens_R-HSA-5218921                                               | 0.006946459 | 0.026660553 |

|                                                                                                              |             |             |
|--------------------------------------------------------------------------------------------------------------|-------------|-------------|
| DNA Damage Bypass_Homo sapiens_R-HSA-73893                                                                   | 0.007015186 | 0.026840711 |
| Transport of the SLBP Dependant Mature mRNA_Homo sapiens_R-HSA-159230                                        | 0.007098244 | 0.027074419 |
| MAPK1/MAPK3 signaling_Homo sapiens_R-HSA-5684996                                                             | 0.007310422 | 0.027797653 |
| Telomere Maintenance_Homo sapiens_R-HSA-157579                                                               | 0.007373009 | 0.027949375 |
| Transcriptional regulation of white adipocyte differentiation_Homo sapiens_R-HSA-381340                      | 0.007447892 | 0.028146635 |
| APC/C:Cdc20 mediated degradation of Cyclin B_Homo sapiens_R-HSA-174048                                       | 0.007580316 | 0.028472407 |
| Gap-filling DNA repair synthesis and ligation in GG-NER_Homo sapiens_R-HSA-5696397                           | 0.007580316 | 0.028472407 |
| Prolonged ERK activation events_Homo sapiens_R-HSA-169893                                                    | 0.007816468 | 0.029270177 |
| Signaling by FGFR2_Homo sapiens_R-HSA-5654738                                                                | 0.007870117 | 0.029381772 |
| TP53 Regulates Transcription of Genes Involved in G2 Cell Cycle Arrest_Homo sapiens_R-HSA-6804114            | 0.008182716 | 0.030456514 |
| Lysosome Vesicle Biogenesis_Homo sapiens_R-HSA-432720                                                        | 0.008681818 | 0.032216865 |
| Signaling by EGFR_Homo sapiens_R-HSA-177929                                                                  | 0.008788192 | 0.032513673 |
| Interleukin-2 signaling_Homo sapiens_R-HSA-451927                                                            | 0.009019545 | 0.033269698 |
| Pyruvate metabolism and Citric Acid (TCA) cycle_Homo sapiens_R-HSA-71406                                     | 0.009777102 | 0.035956386 |
| Cellular Senescence_Homo sapiens_R-HSA-2559583                                                               | 0.009856759 | 0.03609047  |
| SUMO is conjugated to E1 (UBA2:SAE1)_Homo sapiens_R-HSA-3065676                                              | 0.00987215  | 0.03609047  |
| PTK6 Regulates RTKs and Their Effectors AKT1 and DOK1_Homo sapiens_R-HSA-8849469                             | 0.00996086  | 0.036199941 |
| Pentose phosphate pathway (hexose monophosphate shunt)_Homo sapiens_R-HSA-71336                              | 0.00996086  | 0.036199941 |
| Signaling by FGFR_Homo sapiens_R-HSA-190236                                                                  | 0.010237867 | 0.037051223 |
| Intrinsic Pathway for Apoptosis_Homo sapiens_R-HSA-109606                                                    | 0.010255249 | 0.037051223 |
| MHC class II antigen presentation_Homo sapiens_R-HSA-2132295                                                 | 0.010535768 | 0.037953409 |
| Cellular response to heat stress_Homo sapiens_R-HSA-3371556                                                  | 0.010659256 | 0.038286306 |
| Conversion from APC/C:Cdc20 to APC/C:Cdh1 in late anaphase_Homo sapiens_R-HSA-176407                         | 0.010912534 | 0.038968818 |
| Signaling by FGFR2 IIIa TM_Homo sapiens_R-HSA-8851708                                                        | 0.010912534 | 0.038968818 |
| Early Phase of HIV Life Cycle_Homo sapiens_R-HSA-162594                                                      | 0.011378862 | 0.040283787 |
| Mismatch repair (MMR) directed by MSH2:MSH6 (MutSalpha)_Homo sapiens_R-HSA-5358565                           | 0.011378862 | 0.040283787 |
| Removal of the Flap Intermediate_Homo sapiens_R-HSA-69166                                                    | 0.011378862 | 0.040283787 |
| Post-translational modification: synthesis of GPI-anchored proteins_Homo sapiens_R-HSA-163125                | 0.012333791 | 0.043539342 |
| Translesion synthesis by Y family DNA polymerases bypasses lesions on DNA template_Homo sapiens_R-HSA-110313 | 0.012633629 | 0.044217701 |
| Transport of Mature mRNA Derived from an Intronless Transcript_Homo sapiens_R-HSA-159231                     | 0.012633629 | 0.044217701 |
| Apoptotic cleavage of cellular proteins_Homo sapiens_R-HSA-111465                                            | 0.012633629 | 0.044217701 |
| Pausing and recovery of Tat-mediated HIV elongation_Homo sapiens_R-HSA-167238                                | 0.012781952 | 0.044484081 |
| Tat-mediated HIV elongation arrest and recovery_Homo sapiens_R-HSA-167243                                    | 0.012781952 | 0.044484081 |
| Clathrin derived vesicle budding_Homo sapiens_R-HSA-421837                                                   | 0.013202083 | 0.045688106 |
| trans-Golgi Network Vesicle Budding_Homo sapiens_R-HSA-199992                                                | 0.013202083 | 0.045688106 |
| Intra-Golgi traffic_Homo sapiens_R-HSA-6811438                                                               | 0.014260512 | 0.048938582 |
| Synthesis, secretion, and inactivation of Glucagon-like Peptide-1 (GLP-1)_Homo sapiens_R-HSA-381771          | 0.014228289 | 0.048938582 |

Lagging Strand Synthesis\_Homo sapiens\_R-HSA-69186

0.014228289 0.048938582
